1

2

3 **Title:** GSK3 and Lamellipodin balance lamellipodial protrusions and focal adhesion

4 maturation in mouse neural crest migration

5

6 **Authors:** Lisa Dobson<sup>1,2</sup>, William B. Barrell<sup>1,2</sup>, Zahra Seraj<sup>1</sup>, Steven Lynham<sup>3</sup>, Sheng-Yuan

7 Wu<sup>2</sup>, Matthias Krause<sup>2\*</sup>, Karen J. Liu<sup>1\*</sup>

8

9 **Affiliations:**

10 <sup>1</sup> Centre for Craniofacial and Regenerative Biology, King's College London, UK

11 <sup>2</sup> Randall Centre for Cell and Molecular Biophysics, King's College London, UK

12 <sup>3</sup> Centre for Excellence for Mass Spectrometry, King's College London, UK

13

14

15 \*Equal contributors & authors for correspondence: [matthias.krause@kcl.ac.uk](mailto:matthias.krause@kcl.ac.uk),

16 [karen.liu@kcl.ac.uk](mailto:karen.liu@kcl.ac.uk)

17

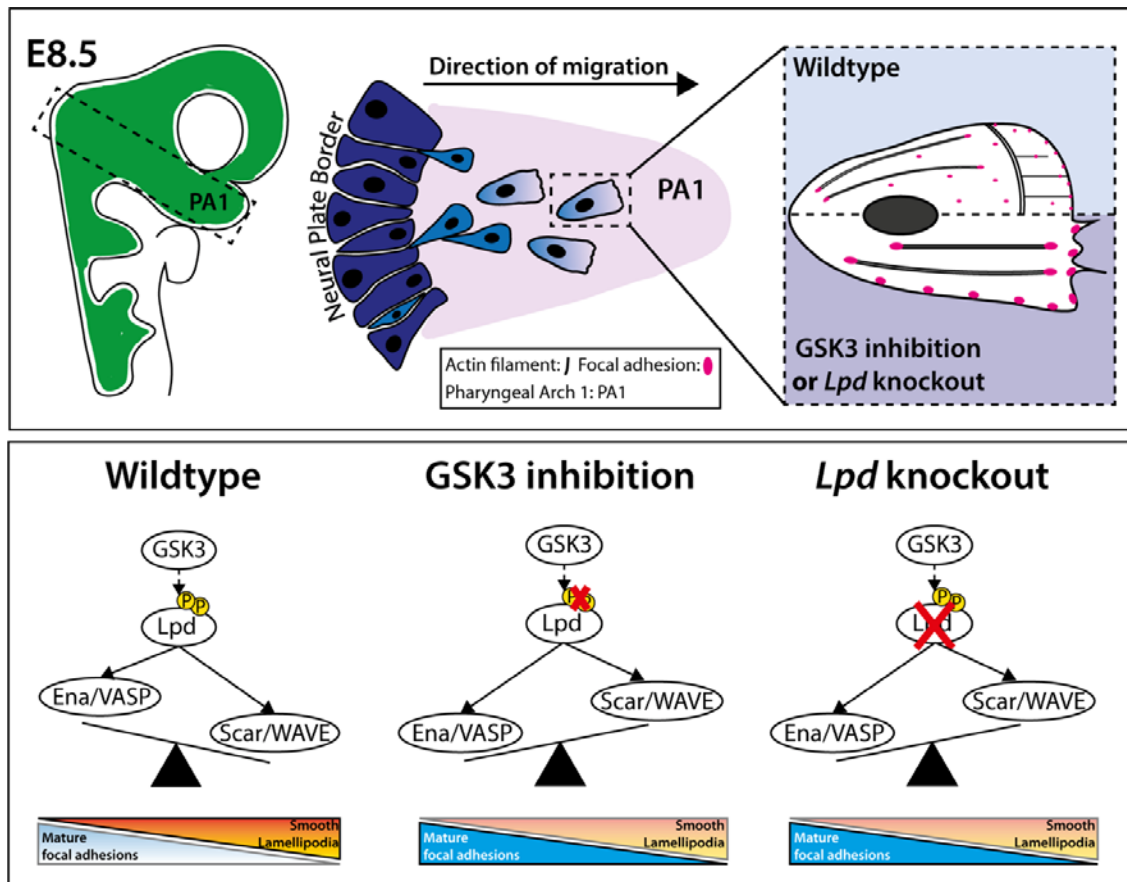

18

19

**ABSTRACT:** Neural crest cells are multipotent cells that delaminate from the neuroepithelium, migrating to distant destinations throughout the embryo. Aberrant migration has severe consequences, such as congenital disorders. While animal models have improved our understanding of neural crest anomalies, the *in vivo* contributions of actin-based protrusions are still poorly understood. Here, we demonstrate that murine neural crest cells use lamellipodia and filopodia *in vivo*. Using neural crest-specific knockouts or inhibitors, we show that the serine-threonine kinase, Glycogen Synthase Kinase-3 (GSK3), and the cytoskeletal regulator, Lamellipodin (Lpd), are required for lamellipodia formation whilst preventing focal adhesion maturation. We consequently identified Lpd as a novel substrate of GSK3 and found that phosphorylation of Lpd favours Lpd interactions with the Scar/WAVE complex (lamellipodia formation) at the expense of Ena/VASP protein interactions (adhesion maturation and filopodia formation). All together, we provide an improved understanding of cytoskeletal regulation in mammalian neural crest migration, which has general implications for neural crest anomalies and cancer.

33

## 34 INTRODUCTION

35 Neural crest cells are highly migratory multipotent cells that give rise to diverse  
36 tissues, such as the craniofacial skeleton and the peripheral nervous system<sup>1</sup>. Following  
37 their specification and induction, neural crest cells delaminate from the neural plate border,  
38 undergo an epithelial-to-mesenchymal transition (EMT), and migrate long distances to  
39 populate distant organs (for review, see: <sup>1-3</sup>). In *Xenopus*, chicken and mouse, cranial neural  
40 crest cells migrate within defined streams towards the frontonasal process (FNP) and  
41 pharyngeal arches (PA) 1 and 2 <sup>2,4-7</sup>.

42 Mesenchymal migration requires the formation of actin-based protrusions at the cell  
43 leading edge which are constantly interacting with the surrounding extracellular matrix  
44 (ECM) through integrin-based adhesions<sup>8-12</sup>. Because the *in vivo* migration of neural crest  
45 cells is highly species-specific<sup>2,13,14</sup>, it is unclear whether the use of specific actin-based  
46 protrusions, such as sheet-like protrusions (lamellipodia) or finger-like protrusions (filopodia),  
47 is conserved. We and others have proposed that mouse cranial neural crest cells use  
48 lamellipodial protrusions for efficient locomotion *in vitro*<sup>13</sup>. However, due to the difficulty in  
49 live imaging mouse neural crest cells, very little is known about the cytoskeletal  
50 requirements for *in vivo* migration.

51 We previously showed that the serine-threonine kinase Glycogen Synthase Kinase-3  
52 (GSK3) is required during mouse neural crest development<sup>13</sup>. Conditional loss of both  
53 isoforms (GSK3 $\alpha$  and GSK3 $\beta$ ) led to a loss of expression of the neural crest-specific  
54 transcription factor, *Sox10*, in the facial prominences, with an associated failure of neural  
55 crest migration<sup>13</sup>. Pharmacological inhibition of GSK3 caused a collapse of lamellipodia<sup>13</sup>,  
56 raising the intriguing possibility that GSK3 may act via Lamellipodin (Lpd, HUGO name:  
57 RAPH1). Lpd is an actin regulator that is an effector of the small GTPase Rac1, the key  
58 regulator of lamellipodia and mesenchymal cell migration<sup>10,15,16</sup>. Indeed, loss of GSK3 activity  
59 in cultured mouse neural crest cells led to mislocalisation of Rac1 and Lpd<sup>13</sup>. Here, we report

60 that the *in vivo* deletion of *Lpd* in neural crest cells mimics the cellular effects of GSK3  
61 inhibition, with an increase in filopodial protrusions.

62 Lpd promotes cell migration via interactions with both the Scar/WAVE complex and  
63 with Ena/VASP proteins<sup>16,17</sup>. The Scar/WAVE complex is essential for lamellipodia formation  
64 and is composed of five proteins (Sra1/Pir121, Nap1, Scar/WAVE1-3, Abi1-3, and  
65 HSPC300), which activate the Arp2/3 complex to induce branched actin filament  
66 nucleation<sup>10,18,19</sup>. In contrast, Ena/VASP proteins (VASP, Mena, EVL) increase actin filament  
67 length at the cell leading edge by temporarily preventing capping of actin filaments and  
68 recruiting polymerisation-competent G-actin bound to profilin<sup>20-27</sup>. In addition, Ena/VASP  
69 proteins are required for integrin-based adhesion maturation<sup>28</sup>.

70 Here, we show that mouse neural crest cells use lamellipodia and filopodia for  
71 migration. Loss of *Lpd* caused a switch from lamellipodial to filopodial protrusion *in vitro* and  
72 *in vivo*. The cell behaviours are reminiscent of the published Arp2/3 knockouts whereby Wu  
73 and colleagues (2012)<sup>29</sup> examined mouse embryonic fibroblasts (MEFs). This suggests that  
74 neural crest cell migration depends on Lpd functioning via Scar/WAVE-Arp2/3 complexes. In  
75 addition, we found that GSK3 acts via Lpd to inhibit focal adhesion maturation underneath  
76 the lamellipodium. Increased GSK3 kinase activity promoted Lpd interaction with the  
77 Scar/WAVE complex while reducing interaction with the Ena/VASP proteins, VASP and  
78 Mena. We then used mass spectrometry analysis to identify multiple Ser/Thr GSK3-  
79 dependent phosphorylation sites in Lpd, including sites localised within the C-terminus that  
80 overlap with known Scar/WAVE complex and Ena/VASP protein binding sites<sup>15,16</sup>. Thus,  
81 GSK3 and Lpd cooperate to coordinate lamellipodial protrusions with adhesion maturation to  
82 support actin-based migration of mouse cranial neural crest cells.

83

## 84 **RESULTS**

### 85 *Murine neural crest cells use lamellipodia and filopodia in vivo*

86 Mouse neural crest cells are known to undergo defined, directed migration. However,  
87 a detailed analysis of their *in vivo* membrane protrusions has not previously been performed.

88 To do this, we used mouse lines carrying either Cre-dependent *LifeAct-EGFP* or *R26R<sup>mtmg</sup>*.  
89 *LifeAct-EGFP* encodes a reporter of filamentous actin dynamics, while *R26R<sup>mtmg</sup>* animals  
90 express membrane tagged fluorescent Tomato (mT), which is switched to membrane green  
91 fluorescent protein (mGFP) upon breeding with a Cre-transgene<sup>30,31</sup>. Here, we labelled  
92 neural crest cells by inter-crossing either reporter line to the neural crest-specific *Wnt1::cre*  
93 line<sup>32</sup>.

94 In wildtype embryos, mGFP-labelled cranial neural crest cells (*Wnt1::cre*;  
95 *Rosa26R<sup>mtmg</sup>*) can be visualised by the 4 somite stage (4ss) at approximately embryonic day  
96 8.5 (E8.5) (Figure 1A). By the 7-somite stage (Figure 1B), neural crest cells delaminate from  
97 the neuroepithelium and migrate toward the pharyngeal arches (Figure 1A-B). At this stage,  
98 we can observe cells destined for pharyngeal arch 1 (PA1), which will give rise to the jaws  
99 (Fig 1C, yellow arrowhead). Similarly, migration of the 2<sup>nd</sup> pharyngeal arch (PA2) stream is  
100 also under way (Figure 1C, white arrowhead), whilst the vagal/cardiac neural crest cells can  
101 be seen emerging (Figure 1C, asterisk), as schematised in (Figure 1D).

102 To visualise the membrane protrusions of individual cranial neural crest cells  
103 destined for PA1, we used live confocal microscopy to image these cells *in vivo* (Figure 1E-  
104 G). We observed that migratory neural crest cells have cellular protrusions interacting with  
105 other neural crest cells as well as with surrounding non-neural crest mesenchyme and the  
106 extracellular environment (Supplementary Movies 1-3). Whilst most protrusions observed  
107 were filopodial, lamellipodia were seen emanating from delaminating cranial neural crest  
108 cells (Figure 1E (magenta arrowhead), Supplementary Movie 1). In some instances,  
109 lamellipodia resolved into filopodia following initial outward protrusion (Figure 1F (unfilled  
110 magenta arrowhead), Supplementary Movie 2). In contrast, in more distal domains, broad  
111 protrusions were infrequently observed (Figure 1G). Instead, multiple filopodia were seen  
112 extending from the edge of broad protrusive structures (Figure 1G (yellow arrowhead) and  
113 Supplementary Movie 3).

114

115 *Glycogen Synthase Kinase-3 (GSK3) is required for lamellipodia formation and neural crest*  
116 *migration*

117 We previously reported a collapse of neural crest lamellipodia upon pharmacological  
118 inhibition or genetic knockout of both GSK3 isoforms (*GSK3 $\alpha$ /GSK3 $\beta$* ) in mouse, which led  
119 to inefficient cell migration<sup>13</sup>. How GSK3 regulates lamellipodia in mouse neural crest cells,  
120 and whether this affects the cell speed and persistence at the single cell level remains  
121 unknown. To address this, we used neural crest explant cultures, where we dissect out the  
122 neural plate border at E8.5, during the early stages of neural crest induction (Figure 2A-B).  
123 This allows systematic assessment of mouse neural crest cells as they delaminate and  
124 migrate away from the neural plate border (Figure 2C)<sup>33</sup>. Neural crest cells can then be  
125 treated with pharmacological inhibitors at specific time points, for example prior to  
126 delamination or during cell migration. Here, we cultured our wildtype explants for 24 hours  
127 and treated neural crest cells (analogous to E9+ migratory cells) with two different GSK3  
128 pharmacological inhibitors (either BIO or CHIR99021), or DMSO, the vehicle control. Cells  
129 were pre-treated for 1 hour, then continuously imaged live for 18 hours (Figure 2D-F,  
130 Supplementary Movie 4). Cells were tracked throughout the course of time-lapse imaging to  
131 generate trajectory plots (Figure 2D'-F').

132 We found that migratory neural crest cells treated with GSK3 inhibitors (BIO or  
133 CHIR99021) showed reduced speed (MTS) and area explored (Mean Squared  
134 Displacement, MSD), compared to DMSO controls (Figure 2G-H). To accurately quantify cell  
135 persistence, we used direction autocorrelation (Figure 2I), a measure of how the angle of  
136 displacement vectors correlate with themselves<sup>34</sup>. Treatment with the GSK3 inhibitor,  
137 CHIR99021, significantly reduced the direction autocorrelation of neural crest cells,  
138 compared to DMSO controls (Figure 2I). Altogether, our data suggests that GSK3 promotes  
139 neural crest cell migration speed and persistence.

140 We then asked whether GSK3 activity is required for lamellipodia formation  
141 consistent with the previously observed changes in Lpd localisation<sup>13</sup>. We aimed to define  
142 the protrusion dynamics of *Wnt1::cre*-expressing neural crest cells by LifeAct-EGFP time-

143 lapse imaging of F-actin dynamics in migratory cells 36 hours after dissection (1 frame/5 sec,  
144 10 min movie) (Figure 2J-L). Neural crest explants were treated with DMSO vehicle control  
145 or the GSK3 inhibitors, BIO or CHIR99032, 2 hours prior to imaging. This allowed us to  
146 capture the immediate consequences of GSK3 inhibition on lamellipodial dynamics. Wildtype  
147 neural crest cells (treated with DMSO as control) showed highly dynamic lamellipodia,  
148 presented as colour-coded time-lapse projections, whereby the colour corresponds to frame  
149 number (frame 1: red, frame 121: magenta) (Stills: Figure 2J, Supplementary Movie 5). In  
150 contrast, neural crest cells treated with BIO or CHIR99021 did not display a lamellipodium  
151 (Figure 2K-L) and showed significantly reduced average cell circularity and increased  
152 number of filopodia per 5000  $\mu\text{m}^2$  average cell area, compared to DMSO controls (Figure  
153 2M-N, Supplementary Movie 5). In slight variation, neural crest cells treated with CHIR99021  
154 had highly dynamic peripheral membrane ruffles which frequently converted into filopodia  
155 (Figure 2L, Supplementary Movie 5).

156 In addition to the actin-rich membrane protrusions at the cell leading edge, high  
157 levels of LifeAct-EGFP were also associated with rearward stress fibres in DMSO control  
158 neural crest cells (Figure 2K, white arrowhead). In contrast, both BIO- and CHIR99021-  
159 treated neural crest cells displayed high intensity F-actin stress fibres extending from the cell  
160 rear to the leading edge on all sides of the cells (with the cells appearing less polarised)  
161 (Figure 2K-L).

162 To verify that GSK3 is indeed required for lamellipodia formation, we used  
163 immunofluorescence labelling for two key lamellipodial markers, Lpd and Abi1. Abi1 is a  
164 component of the Scar/WAVE complex which is required for branched actin nucleation and  
165 lamellipodia formation, whilst Lpd acts upstream of the Scar/WAVE complex, directly  
166 interacting with Abi1<sup>10,16</sup>. In agreement with other cell types<sup>15,35</sup>, continuous Abi1 and Lpd  
167 staining was seen at the edge of the lamellipodium in approximately 80% of DMSO-treated  
168 neural crest cells (Figure 2O,S). In contrast, following 2 hour GSK3 inhibitor treatment, only  
169 30-50% of neural crest cells displayed an Abi1-positive lamellipodium (Figure 2R). Instead,  
170 cells had punctate Abi1 localisation at the tips of filopodia and/or small remaining areas of

171 Abi1 positive lamellipodia (Figure 2P-Q, quantified in 2R and defined as “compromised”).  
172 Similarly, Lpd only displayed continuous leading edge localisation in 40-45% of cells upon  
173 GSK3 inhibition, with a concurrent increase in filopodia numbers whose tips were positive for  
174 Lpd (Figure 2T-U, quantified in 2V). Furthermore, 24 hour GSK3 inhibition showed similar  
175 albeit more severe phenotypes with a loss of lamellipodia and concurrent Lpd localisation  
176 (Supplementary Figure 1). This raises the intriguing possibility that GSK3 may regulate  
177 lamellipodia formation via Lpd.

178

### 179 *Lamellipodin is required for lamellipodia formation during mouse neural crest migration*

180 We then wanted to define specific roles for *Lpd* in mouse neural crest migration. To  
181 do so, we generated neural crest explant cultures from wildtype (*Wnt1::cre; Lpd<sup>+/+</sup>*), *Lpd*  
182 heterozygous (*Wnt1::cre; Lpd<sup>+/fl</sup>*), and homozygous (*Wnt1::cre; Lpd<sup>fl/fl</sup>*) knockout mouse  
183 embryos (Figure 3A-C, Supplementary Movie 6). We confirmed *Lpd* deletion by  
184 immunostaining for Lpd protein in wildtype, heterozygous and homozygous knockout  
185 cultures two days following dissection (Supplementary Figure 2). We found a significant  
186 reduction in the speed and persistence of *Lpd* knockout cells compared to controls (Figure  
187 3A-F) suggesting that inhibition of GSK3 and knockout of *Lpd* phenocopy each other and  
188 thus that they may act in the same pathway.

189 Time-lapse imaging of actin dynamics was then completed in *Lpd* wildtype,  
190 heterozygous and homozygous knockout neural crest cells, 36 hours after dissection (1  
191 frame/5 sec, 10 min movie) (Stills: Figure 3G-I). Wildtype neural crest cells presented highly  
192 dynamic lamellipodial protrusions, presented as colour-coded time-lapse projections,  
193 whereby the colour corresponds to frame number (frame 1: red, frame 121: magenta) (Stills:  
194 Figure 3G, Supplementary Movie 7). In contrast, neural crest cells with heterozygous  
195 expression of *Lpd* displayed highly unstable membrane ruffles at the cell leading edge  
196 (Figure 3H, arrowhead, Supplementary Movie 7), with an overall reduced cell circularity  
197 (Figure 3J). More drastically, *Lpd* conditional knockout neural crest cells lacked a



198 lamellipodium, associated with reduced average cell circularity and an increased number of  
199 filopodial protrusions (Figure 3I-K, asterisk) which, were highly dynamic and after initial  
200 outward extension, flipped backward into the lamella (Supplementary Movie 7).

201 To unambiguously detect lamellipodia, we stained wildtype, *Lpd* heterozygous and  
202 *Lpd* homozygous knockout neural crest explants for the lamellipodial marker *Abi1* (Figure  
203 3L-N). In wildtype neural crest cells, approximately 80% of cells had continuous *Abi1*  
204 immunostaining, indicative of lamellipodia formation (Figure 3L, arrow, 3O). In *Lpd*  
205 heterozygous neural crest cells, 50% displayed a compromised lamellipodium in which  
206 protrusions appeared as unstable ruffles (Figure 3M, arrowhead, 3O). Most *Lpd* knockout  
207 cells lacked an *Abi1*-positive lamellipodium, with only 15% retaining small areas of  
208 lamellipodia (Figure 3N, asterisk, 3O). These data identify a novel requirement for *Lpd* in  
209 lamellipodia formation in primary mouse cranial neural crest cells. This change in actin  
210 dynamics, loss of lamellipodia, and induction of filopodia upon loss of *Lpd* is reminiscent of  
211 phenotypes reported for cells lacking the Arp2/3 complex, an essential nucleator of  
212 lamellipodial branched actin<sup>29</sup>. This indicates that *Lpd* may be functioning upstream of  
213 Scar/WAVE-Arp2/3 complexes<sup>16</sup> in neural crest cells.

214

#### 215 *Lamellipodin controls actin-based protrusions in mouse neural crest cells in vivo*

216 To determine whether *Lpd* regulates actin-based protrusions *in vivo*, we generated  
217 mice carrying neural crest-specific expression of the membrane-EGFP reporter with or  
218 without conditional *Lpd* knockout<sup>16,30,32</sup>. *Lpd* knockout in the neural crest lineage significantly  
219 reduced the number of *Lpd* knockout pups born at early postnatal stage, P0 (Supplementary  
220 Figure 3). Moreover, a significant difference was seen between the expected and observed  
221 number of *Lpd* knockout embryos at the early embryonic timepoint, E8.5 (Supplementary  
222 Figure 3). However, we did not observe gross morphological differences when comparing  
223 wildtype, *Lpd* heterozygous (*Wnt1::cre; Lpd<sup>+/fl</sup>; Rosa26R<sup>mtmg</sup>*) and *Lpd* homozygous knockout  
224 (*Wnt1::cre; Lpd<sup>fl/fl</sup>; Rosa26R<sup>mtmg</sup>*) embryos at E8.5 or E9.5 (Figure 4A-C, G-H).

225            Nevertheless, at somite stage 6-10 (E8.75), we observed a significant increase in the  
226 number of filopodial protrusions in homozygous *Lpd* knockout neural crest cells *in vivo*  
227 (Figure 4C") compared to wildtype (Figure 4A", quantified in Figure 4F). This suggest that  
228 *Lpd* is also required *in vivo* for lamellipodia formation and in its absence lamellipodial  
229 protrusions are replaced by filopodia. Furthermore, despite similar size (area) of neural crest  
230 cells in all genotypes (Figure 4B", D), average cell circularity was increased in *Lpd*  
231 heterozygous cells and decreased in *Lpd* homozygous mutant cells (Figure 4C", E).

232            By 24-26 somite stage (E9.5) neural crest cells have filled the first and second  
233 pharyngeal arches (yellow and white arrowheads), cardiac/vagal neural crest cells (asterisk)  
234 have migrated more ventrally, and more posterior trunk crest streams are migrating (e.g. at  
235 somite 16) (open arrowhead) (Figure 4G). To examine whether the role of *Lpd* in regulating  
236 cranial neural crest cell protrusions was conserved at E9.5 *in vivo*, we examined the cranial  
237 neural crest streams migrating away from the dorsal neural tube and towards pharyngeal  
238 arch 1 in transverse cryo-sections through the head of E9.5 embryos (Figure 4I-J). We  
239 examined cells at the edge of the migratory stream, and from within the inner neural crest  
240 stream (Figure 4I'-J'). For both locations we found that *Lpd* homozygous knockouts were  
241 more elongated compared to wildtype controls (Figure 4I'-J', K-L), and displayed an  
242 increased number of filopodia/100 $\mu\text{m}^2$  (Figure 4M-N). Together, these data support a role for  
243 *Lpd* in counteracting filopodia formation (whilst potentially supporting lamellipodia formation)  
244 in cranial neural crest cells *in vivo*.

245

#### 246 *Lpd* is a substrate of GSK3 kinase

247            Since we observed that inhibition of GSK3 activity and loss of *Lpd* phenocopy each  
248 other, we hypothesised that GSK3 might directly phosphorylate *Lpd* to control its function at  
249 the leading edge of cells. To test this, we expressed an *Lpd*-EGFP fusion protein in  
250 HEK293FT cells in the presence or absence of a constitutively active HA-tagged GSK3 $\beta$   
251 (HA-GSK3 $\beta$ -DA). Following immunoprecipitation (IP) of EGFP-tagged *Lpd*, we found that

252 HA-GSK3 $\beta$ -DA weakly associated with Lpd-EGFP (Figure 5A, lane 6). Co-expression of HA-  
253 GSK3 $\beta$ -DA with Lpd-EGFP also increased overall serine-threonine phosphorylation of Lpd,  
254 but reduced Lpd threonine phosphorylation (Figure 5A, lane 6), suggesting that GSK3 $\beta$  may  
255 preferentially phosphorylate Lpd on serine residues.

256 To map the GSK3 phosphorylation sites on Lpd, we expressed the Lpd-EGFP fusion  
257 protein in HEK293FT cells with or without treatment with the GSK3 inhibitor, BIO, or co-  
258 expression of Lpd-EGFP with HA-GSK3 $\beta$ -DA. After immunoprecipitation of Lpd-EGFP,  
259 tandem mass spectrometry was performed. By comparing these loss- and gain-of-function  
260 scenarios, we observed GSK3-dependent changes in multiple Ser/Thr phosphorylation sites  
261 throughout Lpd (Figure 5B-C). Lpd is known to interact with the N-terminal EVH1 domain of  
262 Ena/VASP proteins via 7 proline-rich motifs characterised by a core motif composed of  
263 phenylalanine followed by four prolines which is flanked by acidic amino acids (FP4 motifs)  
264 (Figure 5B)<sup>15</sup>. Three GSK3 phosphorylation sites in Lpd were therefore of particular interest:  
265 GSK3 $\beta$  overexpression was associated with phosphorylation at three serine residues  
266 (S1066, S1069, S1071) in the C-terminus, specifically within the fourth Lpd FP4 motif (FP4-  
267 4) (Figure 5C, right) two of which were no longer phosphorylated upon GSK3 inhibition  
268 (Figure 5C, Ser-1066, Ser-1069).

269 In addition, GSK3 was also associated with phosphorylation at T1123, a threonine  
270 within the second Abi1 binding site on Lpd<sup>36</sup> (Figure 5C, right). These data suggest that Lpd  
271 is a novel substrate of GSK3, and that GSK3 phosphorylation of Lpd may regulate its  
272 interactions with Ena/VASP proteins and/or the Scar/WAVE complex.

273

274 *GSK3 promotes Lpd interactions with the Scar/WAVE complex and reduces interactions with*  
275 *Ena/VASP proteins*

276 As noted, a key function of Lpd is to act as a scaffold for the major actin effectors,  
277 Scar/Wave-Arp2/3 complexes or Ena/VASP proteins. Based on the mass spectrometry data,  
278 we proposed that GSK3-dependent phosphorylations alter Lpd interactions with these

279 partner proteins. First, we tested the Lpd-Scar/WAVE interaction by co-expressing Lpd-  
280 EGFP and Myc-tagged Scar/WAVE complex components (Sra1, Nap1, Scar/WAVE2, Abi1,  
281 HSPC300) with or without HA-GSK3 $\beta$ -DA (Figure 5D). Co-immunoprecipitation of Lpd with  
282 the Scar/WAVE complex was increased in the presence of dominant active GSK3 $\beta$  (Figure  
283 5D, lane 6).

284 The analogous Ena/VASP interaction experiment was performed with Lpd-EGFP,  
285 Myc-tagged Ena/VASP proteins (VASP, Mena or EVL) and HA-GSK3 $\beta$ -DA (Figure 5E,  
286 EGFP pulldown). The full protein lysate control blot can be found in (Supplementary Figure  
287 4). When not co-expressed with GSK3 $\beta$ , Lpd-EGFP showed the strongest interaction with  
288 the Ena/VASP protein, EVL (Figure 5E, lane 7), and a weaker interaction with Mena and  
289 VASP (Figure 5E, lanes 3, 5). Surprisingly, in contrast to the Lpd-Scar/WAVE complex  
290 interaction, co-expression of HA-GSK3 $\beta$ -DA reduced the interaction of Lpd with VASP and  
291 Mena, but not with EVL (Figure 5E, lanes 4,6, quantified in Figure 5F-G). We also found that  
292 the co-expression of Lpd-EGFP with Myc-Ena/VASP led to an increase in the amount of HA-  
293 GSK3 $\beta$ -DA associated with Lpd-EGFP in the IP (compare Figure 5D lane 6 with Figure 5E,  
294 lanes 4, 6, 8, and quantified in Figure 5H), suggesting the formation of a stable complex  
295 between Lpd, GSK3 and Ena/VASP proteins. Together this suggests that GSK3 acts to  
296 promote Lpd interactions with the Scar/WAVE complex but reduces Lpd interactions with the  
297 Ena/VASP proteins, VASP and Mena.

298

299 *GSK3 and Lpd promote Ena/VASP localisation to the leading edge at the expense of focal*  
300 *adhesions in mouse neural crest cells*

301 We then turned back to the *Lpd* genetic mutants to determine whether endogenous  
302 Lpd is required for Ena/VASP protein localisation during neural crest cell migration. Both  
303 Mena and VASP (Figure 6A, L', Supplementary Figure 6-7) are expressed in migratory  
304 cranial neural crest cells, and double *Mena/VASP* knockout mice display neurulation and  
305 craniofacial defects, indicative of an essential function in the mouse neural crest<sup>37,38</sup>. We

306 focused here on Mena localisation at the very edge of the lamellipodium and in focal  
307 adhesions. During lamellipodia formation, adhesions occur underneath the newly formed  
308 protrusion, and focal adhesion maturation must occur before cell rear contraction in order to  
309 sustain efficient contractile forces<sup>39-41</sup>. As expected from other cell types<sup>42</sup>, Mena  
310 predominantly localises to mature adhesions at the cell rear and to the lamellipodia in mouse  
311 neural crest cells (Figure 6A-A', L).

312 When we quantified the localisation to lamellipodia, we found that 80% of wildtype  
313 neural crest cells display lamellipodia but Mena only localised to 50% of lamellipodia (Figure  
314 6A, D). This suggests that, at least in neural crest cells, Mena is not a constitutive  
315 component of lamellipodia. As noted above, in *Lpd* heterozygous and homozygous knockout  
316 cells, most migratory cells did not have a lamellipodium (Figure 3N-P). However, 55% of  
317 heterozygous and 30% of homozygous *Lpd* knockout neural crest cells displayed small  
318 ruffles positive for Mena instead of a lamellipodium (Figure 6B-C',D). This lack of  
319 lamellipodia meant that we were unable to definitively conclude whether *Lpd* was required  
320 for leading edge localisation of Mena.

321 We then assessed the requirements for *Lpd* in the recruitment of Mena to focal  
322 adhesions. We used antibody staining to analyse endogenous Mena localisation at the  
323 whole cell level (Figure 6E-F) and within the front, middle and back thirds of the cell (Figure  
324 6G-K). At the whole cell level, no significant difference was seen in the average number of  
325 Mena-positive focal adhesions per 100  $\mu\text{m}^2$  nor average Mena-positive focal adhesion area  
326 between *Lpd* wildtype and *Lpd* homozygous knockout neural crest cells (Figure 6E-F).  
327 However, within the cell front, *Lpd* knockout neural crest cells had a significantly increased  
328 number of Mena-positive mature focal adhesions, compared to controls and *Lpd*  
329 heterozygous cells (Figure 6H). Conversely, within the back third of cells, there was a  
330 significant reduction in the number of Mena-positive focal adhesions (Figure 6J). Together,  
331 this suggests that genetic loss of *Lpd* shifts Mena-positive mature focal adhesions towards  
332 the front of mouse cranial neural crest cells. This may be a consequence of loss of

333 lamellipodia or may contribute to the loss of lamellipodia as focal complexes may mature  
334 more quickly.

335 We then checked whether GSK3-dependent phosphorylation affected Lpd-Mena co-  
336 localisation. Wildtype explants were treated with DMSO control or GSK3 inhibitors (BIO or  
337 CHIR99021) for 2h or 24h prior to fixation. Explants were co-immunostained for Lpd and  
338 Mena (Figure 6L-N'). In DMSO controls, Lpd and Mena, as expected, showed high levels of  
339 co-localisation at the lamellipodial edge (Figure 6L-L'). Following 2h and 24h BIO treatment,  
340 significantly less cells had Mena- and Lpd-positive lamellipodia (Figure 6O-P). Notably, both  
341 BIO and CHIR99021 dramatically increased the size of Mena-positive focal adhesions, as  
342 well as increased focal adhesion number upon BIO treatment (Figure 6M-N', Q-T,  
343 Supplementary Figure 5).

344 This effect occurred rapidly, within 2 hours of treatment, and was reversible upon the  
345 washout of pharmacological inhibitor (Supplementary Figure 6). Wash-out progressively  
346 reversed cell front localisation of Mena-positive mature focal adhesions, which was  
347 reinstated by 15h BIO wash-out (Supplementary Figure 6A, C-F). Similarly, re-localisation of  
348 Lpd and Mena to the edge of lamellipodial protrusions was seen by 18 hour washout  
349 (Supplementary Figure 6B). BIO wash-out was also able to rapidly and reversibly control  
350 VASP localisation within cranial neural crest cells (Supplementary Figure 7). These  
351 experiments combined suggest that GSK3 phosphorylates Lpd to counteract Ena/VASP  
352 recruitment to focal complexes at the leading edge of migratory neural crest cells.

353

#### 354 *Lpd prevents focal complex maturation*

355 Recruitment of Ena/VASP proteins to early adhesions is mediated by direct  
356 interaction with the Lpd-related protein, RIAM<sup>43</sup>. Ena/VASP proteins then promote focal  
357 adhesion maturation and cell spreading<sup>27,28,42-48</sup>. RIAM is required for integrin activation  
358 through a direct interaction with talin<sup>43,49-51</sup>. RIAM binds to talin in nascent adhesions, and  
359 must be displaced by vinculin for maturation of focal complexes<sup>52</sup>.

360 Lpd may play a similar role to RIAM in neural crest cells as single cell RNAseq  
361 revealed that Lpd but not RIAM is expressed in cranial neural crest cells<sup>53</sup>. Therefore, we  
362 examined the distribution of vinculin, to mark focal complexes, and zyxin which only appears  
363 after maturation into focal adhesions<sup>54-57</sup>. As expected, vinculin was localised to focal  
364 complexes behind the lamellipodial edge and mature adhesions throughout the cell (Figure  
365 7A-A'), whilst zyxin was localised to stress fibres and mature adhesions at the rear of  
366 wildtype cells (Figure 7H-H'). Upon *Lpd* deletion, the area but not the number of vinculin-  
367 positive adhesions dramatically increased, with altered localisation to the cell periphery  
368 (Figure 7C-C', D-G) suggesting that these represent more mature focal adhesions.

369 At the whole cell level, the overall numbers and area of zyxin-positive focal  
370 adhesions did not change significantly in mutants (Figure 7J-J', K-N). However, a significant  
371 change in the distribution of zyxin-positive adhesions between the front, middle and back  
372 third of neural crest cells was apparent (Figure 6O-P). At the front of the cell, both the  
373 number and length of zyxin-positive mature focal adhesions was increased in *Lpd* knockout  
374 cells (Figure 7Q, S), with the zyxin-positive focal adhesion length also increased at the cell  
375 rear (Figure 7W). These data suggest that *Lpd* genetic deletion causes a premature  
376 maturation of focal complexes. We therefore propose that Lpd promotes lamellipodia  
377 formation through its interaction with the Scar/WAVE complex and by controlling focal  
378 complex maturation through its interaction with Mena and VASP.

379

## 380 **DISCUSSION**

381 Here, we report that mouse cranial neural crest cells use lamellipodia and filopodia *in*  
382 *vivo*. By culturing primary neural crest cells, we show that inhibition of GSK3 or deletion of  
383 *Lpd* causes defective lamellipodia formation and focal adhesion maturation. Loss of GSK3  
384 and Lpd phenocopy one another, indicating that both are required to promote cranial neural  
385 crest migration. We then identify GSK3-dependent phosphorylation of Lpd on many S/T  
386 sites, including in an Ena/VASP binding site and a Scar/WAVE complex binding site. GSK3  
387 activity increases Lpd binding to the Scar/WAVE complex, whilst decreasing Lpd-VASP and

388 -Mena interactions. Thus, GSK3 may promote lamellipodia formation through Lpd-  
389 Scar/WAVE and inhibit focal adhesion maturation by reducing the recruitment of VASP and  
390 Mena to Lpd at these sites.

391 Neural crest cells are known to have species-specific and neural crest stream-  
392 specific cellular behaviours<sup>2,14</sup>. Differences in actin-based protrusions have also been  
393 observed, with filopodia predominantly used *in vivo* in the zebrafish neural crest<sup>14,58</sup>, whilst  
394 both lamellipodia and filopodia are used in chicken and *Xenopus* cranial neural crest cells *in*  
395 *vivo*<sup>59-61</sup>. However, actin-based protrusions are not well-described in mouse. We previously  
396 observed lamellipodia in mouse neural crest cells in culture, and the loss thereof in *GSK3*  
397 knockouts<sup>13</sup>. However, the *in vivo* protrusions used in mouse neural crest cell populations  
398 are unknown. Here, we provide evidence for the use of lamellipodia in mouse cranial neural  
399 crest cells *in vivo*. Notably, lamellipodia are seen in early delaminating neural crest cells,  
400 whilst in later streams filopodia predominate (Figure 1). Our data is consistent with the  
401 known role of filopodia in sensing and responding to chemo-attractive and durotactic signals,  
402 crucial to migration in complex 3D environments<sup>8,12,60,62-65</sup>, such as the *in vivo* cranial neural  
403 crest streams, migration of the embryonic mesoderm wings<sup>66</sup> and myotube migration through  
404 the *Drosophila* testes<sup>67</sup>. These studies highlight the importance of both lamellipodia and  
405 filopodia during *in vivo* and developmental mesenchymal migration programmes.

406 The requirement for Lpd in lamellipodia formation in mouse neural crest cells (Figure  
407 3) is complementary to previous studies in *Lpd* knockdown B16-F1 melanoma cells and *Lpd*  
408 conditional knockout mouse embryonic fibroblasts<sup>15,16</sup>. This contrasts with a report using  
409 CRISPR-Cas9-driven permanent *Lpd* knockout in B16-F1 melanoma cells which found Lpd  
410 to be dispensable for lamellipodia formation<sup>68</sup>, suggesting that the permanent knockout of  
411 *Lpd* induces compensatory upregulation of other genes that maintain lamellipodium  
412 architecture. *Arp2/3* knockout mouse embryonic fibroblasts and neural crest-derived  
413 melanoblasts lacking *Arp2/3* also present an increased number of filopodia at the cell  
414 edge<sup>29,69</sup>. These phenotypes are in agreement with our study, which complements previous  
415 reports of Lpd-Scar/WAVE interactions promoting *Xenopus* cranial neural crest migration<sup>16</sup>.



416 A key novelty in our work is the identification of Lpd as a substrate for GSK3 (Figure  
417 5). GSK3 is known to be highly promiscuous, with many potential target substrates<sup>70</sup>.  
418 However, very few of these target proteins have been challenged using both loss- and gain-  
419 of-function experiments<sup>71,72</sup>. As such, Lpd is now one of only a few functionally validated  
420 GSK3 substrates that can directly regulate actin-based motility downstream of Rac1 (Figure  
421 5)<sup>10</sup>. This is in contrast to known GSK3 substrates that regulate mesenchymal migration via  
422 microtubule stability downstream of Cdc42<sup>73-77</sup>, as well as focal adhesion dynamics via  
423 FAK<sup>78,79</sup>.

424 At least two distinct tyrosine kinases, c-Src and c-Abl, have been reported to regulate  
425 Lpd<sup>17,80</sup>. Phosphorylation of Lpd by c-Src promotes Lpd interaction with the Scar/WAVE  
426 complex *in vitro*, whilst c-Abl phosphorylation increases Lpd interactions with both  
427 Ena/VASP proteins and the Scar/WAVE complex during 3D cancer cell invasion<sup>17,80</sup>.  
428 However, GSK3 is the first serine/threonine kinase shown to phosphorylate Lpd that acts as  
429 a dual regulator, where activation of one pathway (Scar/WAVE) is favoured over the other  
430 (Ena/VASP) which is concurrently downregulated.

431 A previous paper reported that GSK3 phosphorylation of Daydreamer, a distantly  
432 related orthologue of Lpd, is required to control chemotaxis in *Dictyostelium*<sup>81</sup>, suggesting  
433 that the GSK3-Lpd signalling pathway is evolutionary conserved. From our mass  
434 spectrometry screen, we identified multiple GSK3 serine-threonine phosphorylation sites  
435 throughout Lpd that fell into two subgroups. First, phosphorylation of Lpd at Thr-1123  
436 overlaps with the Abi1 SH3 domain binding site 2, thus should affect Scar/WAVE binding  
437 (Figure 5)<sup>16</sup>. Of the three known Abi binding sites, Abi1 binding site 2 is known to elicit the  
438 weakest interaction between Lpd and Abi in the absence of phosphorylation<sup>16</sup>. Indeed, we  
439 saw a modest increase in co-immunoprecipitation of the Scar/WAVE complex with Lpd when  
440 co-expressed with dominant-active GSK3 $\beta$  (Figure 5). Second, the three serine sites (Ser-  
441 1066, Ser-1069, Ser-1071) reside within the Ena/VASP FP4-4 EVH1 domain binding site  
442 (Figure 5)<sup>15,80</sup>. GSK3 phosphorylation of these serines should create a negative charge  
443 within the core polyproline II helix, potentially reducing interaction with the EVH1 domain.

444 Consistent with this hypothesis, GSK3 activity decreased the binding of Lpd with VASP and  
445 Mena (Figure 5). Thus, Lpd may act as an integrator of multiple signals including Rac, PI3-  
446 kinase, c-Abl, c-Src, and now also GSK3 to finetune the directed migration of the cell in  
447 response to extracellular cues.

448 Our work also suggests that GSK3 phosphorylates Lpd not only to promote  
449 lamellipodia extension but also to prevent focal adhesion maturation. Both GSK3 inhibition  
450 and *Lpd* deletion caused a loss of focal complexes underneath the lamellipodium, with the  
451 accumulation of mature zyxin- and Mena-positive focal adhesions seen towards the front of  
452 cells (Figure 6-7). Similarly, *Lpd* knockout cells have recently been shown to increase  
453 mature adhesions at the leading edge of B16-F1 melanoma cells lines<sup>68</sup>. Interestingly, at the  
454 whole cell level, the size of zyxin- and Mena-positive focal adhesions was only significantly  
455 reduced in *Lpd* heterozygous neural crest cells, compared to wildtype controls and *Lpd*  
456 knockout cells (Figure 6-7). This suggests a gene dosage effect of *Lpd* deletion via a  
457 secondary currently unknown mechanism.

458 The subcellular localisation of Ena/VASP proteins is regulated by their interactions of  
459 their N-terminal EVH1 domain with FP4 motif-containing proteins<sup>82</sup>, such as Lpd but also  
460 RIAM, vinculin and zyxin which recruit Ena/VASP proteins to focal adhesions<sup>83-85</sup>. GSK3-  
461 mediated phosphorylation of Lpd may therefore promote the recruitment of Ena/VASP  
462 proteins to focal complexes underneath the lamellipodium thereby promoting their  
463 conversion to mature focal adhesions. This hypothesis is in agreement with previous  
464 observations that Lpd recruits VASP to leading edge clusters, with subsequent budding off of  
465 VASP patches which mature into focal adhesions<sup>86</sup>.

466 Lpd functioning downstream of Rac1 and via Scar/WAVE-Arp2/3 complexes may  
467 also contribute to inhibition of focal adhesion maturation since comparable focal adhesion  
468 phenotypes to our vinculin immunostaining (Figure 7) have also been seen in Scar/WAVE  
469 complex knock-down cells, Arp2/3-depleted melanocytes and *Arp2/3* knockout MEFs<sup>29,69,87</sup>.  
470 The peripheral localisation pattern of focal adhesions seen in our *Lpd* knockout neural crest  
471 cells was also highly reminiscent of cultured conditional *Rac* knockout neural crest-derived

472 pharyngeal arch cells<sup>88</sup> and Scar/WAVE complex (*Nckap1*) knockout mouse embryonic  
473 fibroblasts<sup>89</sup>. Therefore, the GSK3-Lpd axis together may be required to inhibit the  
474 maturation of focal complexes during lamellipodial protrusions, likely by reducing  
475 Mena/VASP and increasing Scar/WAVE-Arp2/3 function.

476 Our study highlights the usefulness of the *ex vivo* experiments to define the GSK3-  
477 Lpd axis. However, we do note that the neural crest-specific *Lpd* knockouts did not show any  
478 obvious craniofacial phenotypes, in contrast to the neural crest-specific *GSK3* mutants<sup>13</sup>.  
479 One reason for the lack of *in vivo* phenotypes could be due to the relative importance of  
480 lamellipodia versus filopodia in the *in vivo* neural crest, whereby compensation by filopodia  
481 may be sufficient to overcome changes in lamellipodial dynamics<sup>62,63,65,90</sup>. Filopodia can  
482 maintain mesenchymal cell persistence by promoting cell-ECM interactions at the cell  
483 leading edge and by sensing *in vivo* environmental cues<sup>11,63,65,91</sup>. In agreement, Lpd requires  
484 interaction with both actin elongation-associated Ena/VASP proteins and the Scar/WAVE  
485 complex during 3D breast cancer invasion<sup>17</sup>.

486 Moreover, the role of actin regulators during early *in vivo* neural crest development is  
487 still contentious. Embryos carrying a neural crest-specific conditional knockout of *Rac1*,  
488 *Cdc42* or *FAK* do not show defective *in vivo* neural crest migration, quantified by the number  
489 of neural crest cells reaching pharyngeal arch 1, with craniofacial and/or cardiovascular  
490 phenotypes only apparent from E11.5-E13.5<sup>88,92,93</sup>. Given that these deletions are in genes  
491 transcribing Rho GTPases and enzymes with multiple substrates functioning in actin-based  
492 migration, it would therefore follow that Lpd, an actin regulator much further downstream in  
493 the actin network, may not show overt phenotypes at early developmental timepoints (E8.5-  
494 E9.5).

495 It is important to note that GSK3 has additional substrates besides Lpd, most notably  
496  $\beta$ -catenin, which is required for neural crest induction and delamination<sup>13,94,95</sup>. The timing of  
497 GSK3 pharmacological inhibitor treatment within this study, however, allowed us to bypass  
498 GSK3 effects on neural crest delamination and focus on Wnt/ $\beta$ -catenin-independent

499 functions of GSK3 during neural crest migration. GSK3 is also a known cytoskeletal  
500 regulator, and can activate proteins such as Rac1 through an unknown mechanism<sup>79,96</sup> and  
501 Rho via phosphorylation of p190ARhoGAP<sup>97</sup>. Focal adhesion kinase (FAK) is also a  
502 substrate of GSK3 but how this affects cell migration appears to be more complex: GSK3  
503 phosphorylates FAK at Ser-722 thereby inhibiting FAK kinase activity and consequently  
504 reducing cell migration efficiency<sup>78</sup>. However, active GSK3 binds to the phosphodiesterase  
505 Prune, which is localised at focal adhesions and is required for FAK and Rac activation, and  
506 focal adhesion turnover, which agrees with a positive function in cell migration<sup>79</sup>.

507 In conclusion, our results suggest that GSK3 serine-threonine phosphorylation of Lpd  
508 supports the active migration of neural crest cells, by increasing interactions with the  
509 Scar/WAVE complex promoting lamellipodial protrusions, whilst reducing interactions  
510 between Lpd and VASP/Mena which drive focal adhesion maturation and filopodia  
511 formation. An improved understanding of cytoskeletal regulation in neural crest migration will  
512 provide insights into normal development and pathologies such as neurocristopathies and  
513 neuroblastoma.

514

515 **ACKNOWLEDGEMENTS:** We thank members of the Liu and Krause labs for everyday  
516 support, Prof Phillip Gordon-Weeks for insightful discussions, members of CCRB and the  
517 NHH Biological Services Unit for ongoing technical assistance.

518

519 **AUTHOR CONTRIBUTIONS:** Design and management of investigation (MK, KJL),  
520 experimental planning and data curation (MK, KJL, LD), collection and analysis of data (LD,  
521 WBB, S-YW, ZS, SL), manuscript writing (LD, KJL, MK), review, editing and approval of  
522 manuscript (all).

523

524 **COMPETING INTERESTS:** No competing interests.

525

526 **FUNDING:** We acknowledge funding from BBSRC BB/R015953/1 (KJL, MK, LD),  
527 BB/X512047/1 (KJL, LD), MRC PC21044 (KJL, WBB); MRC-Doctoral Training Programme  
528 MR/N013700/1 (LD) and the Double Day Research Fellowship (WBB, KJL).

529

530

531 **FIGURE LEGENDS**

532 **Figure 1. Mouse cranial neural crest cells display lamellipodia and filopodia *in vivo*.**

533 **(A-B)** Maximum projection images of E8.5-8.75 mouse embryos, with the neural crest  
534 lineage-labelled with mGFP (*Wnt1::cre; Rosa26R<sup>mtmg</sup>*), shown as **(A)** dorsal view (4 somite  
535 stage, ss) and **(B)** lateral view (7ss). Scale bar: 500  $\mu$ m. **(C)** Zoom inset of **(B)** showing the  
536 cranial neural crest streams of an E8.75 embryo (7ss). Cranial neural crest cells leave the  
537 neural plate border (NPB) and migrate to populate the frontal nasal process (FNP),  
538 pharyngeal arch 1 (PA1, yellow arrowhead) and pharyngeal arch 2 (PA2, white arrowhead).  
539 Vagal and cardiac neural crest streams also start to emerge (\*). Scale bar: 125  $\mu$ m. **(D)**  
540 Schematic representation of a laterally-oriented E8.75 embryo (7-9ss), with white dashed  
541 boxes showing the imaging regions of interest (ROIs) in **(E-G)**. Green: lineage-labelled  
542 neural crest streams. h: heart, ot: otic vesicle. **(E-G)** Time-lapse stills from live imaging of  
543 laterally-oriented wild-type (*Wnt1::cre; Rosa26R<sup>mtmg</sup>*) E8.75 embryos, with neural crest cells  
544 labelled with mGFP. **(E-F)** Time-lapse stills from two example movies of delaminating cranial  
545 neural crest (solid magenta arrowhead: lamellipodia and open magenta arrowhead:  
546 filopodia). 10 minute movies (1 frame/ 20 seconds), z-depth 24.5  $\mu$ m, 0.5  $\mu$ m per slice. See  
547 **Supplementary Movies 1-2**. **(G)** Filopodial protrusions on distally migrating cranial neural  
548 crest cells (yellow arrowhead). 30 minute movie (1 frame/ 45 seconds), z-depth 40  $\mu$ m, 0.5  
549  $\mu$ m per slice, see **Supplementary Movie 3**. Movies are representative of 3 embryos, all 6-10  
550 somite stage (n=3). Scale bar: 10  $\mu$ m.

551

552 **Figure 2. Inhibition of GSK3 prevents lamellipodia formation and reduces the**

553 **migration efficiency of cranial neural crest cells *ex vivo*.** **(A-C)** Neural crest explant  
554 cultures. **(A)** Schematic representation of a laterally-oriented *Wnt1::cre; Rosa26R<sup>mtmg</sup>* E8.5  
555 embryo (5-8 ss), with neural crest cells lineage-labelled with mGFP and the dissected neural  
556 plate border (NP) pseudo-coloured green. 1: pharyngeal arch 1 (PA1), 2: PA2, ot: otic  
557 vesicle. **(B)** Neural crest explant culture 24 hours after dissection, with the actin filaments  
558 stained with phalloidin (green) and nuclei labelled with Hoechst (blue). The dissected NP is

559 surrounded by pre-migratory neural crest cells (pNC), and an outer migratory neural crest  
560 population (mNC). Box represents imaging area used, as in **(C)**. Scale bar: 500  $\mu\text{m}$ . **(C)**  
561 Phase-contrast image of the neural crest explant edge, used for *ex vivo* cell phenotyping.  
562 Scale bar: 100  $\mu\text{m}$ . **(D-F)** Representative stills from 10x magnification phase-contrast time-  
563 lapse imaging of neural crest explants, cultured from E8.5 wildtype embryos treated with **(D)**  
564 DMSO vehicle control, or the GSK3 inhibitors, **(E)** 0.5  $\mu\text{M}$  BIO or **(F)** 1  $\mu\text{M}$  CHIR99021 for 18  
565 hours (1 frame/ 5 min) (see **Supplementary Movie 4**). Scale bar 100  $\mu\text{m}$ . **(D'-F')** Trajectory  
566 plots of 10 migratory neural crest cells tracked through time-lapse imaging for **(D-F)**. **(G-I)**  
567 Quantification of **(G)** Mean Track Speed (MTS), **(H)** Mean Squared Displacement (MSD) and  
568 **(I)** direction autocorrelation of migratory cranial neural crest cells. For MTS calculations,  
569 each dot represents the mean speed of 10 neural crest cells imaged from the same explant:  
570 DMSO n=17 explants, 170 cells tracked; BIO n=8 explants, 80 cells tracked; CHIR99021  
571 n=7 explants, 70 cells tracked, taken over 4 independent experiments. \*\*\*\* p < 0.0001, \*\*\* p  
572 < 0.001, ns non-significant, one-way ANOVA, Tukey's multiple comparisons test. For  
573 direction autocorrelation measures,  $\Delta t = 1$ , TR = 4 (20 min); see Materials & Methods for  
574 details. **(K-M)** Colour-coded time projection stills of 60x magnification time-lapse imaging (10  
575 min movies, 1 frame/ 5 seconds) of migratory neural crest cells, cultured from E8.5  
576 *Wnt1::cre; LifeAct-EGFP* embryos treated with **(J)** DMSO control, **(K)** 0.5  $\mu\text{M}$  BIO or **(L)** 1  
577  $\mu\text{M}$  CHIR99021, 2h prior to imaging (see **Supplementary Movie 5**). Scale bar 20  $\mu\text{m}$ . **(M-N)**  
578 Quantification of neural crest **(M)** cell circularity and **(N)** filopodia number per 5000  $\mu\text{m}^2$   
579 (approximate average neural crest cell area *ex vivo*). Leading edge protrusions were  
580 included in cell circularity measurements. DMSO: n=59 cells; 2h BIO: n=35 cells; 2h  
581 CHIR99021: n=40 cells analysed, over 3 independent experiments. \*\*\*\* p < 0.0001, \*\*\* p <  
582 0.001, ns non-significant, one-way ANOVA, Tukey's multiple comparisons test. **(O-Q)** Abi1  
583 immunostaining of fixed migratory cranial neural crest cells, cultured from E8.5 *Wnt1::cre;*  
584 *LifeAct-EGFP* embryos, treated for 2 hours with **(O)** DMSO control, **(P)** 0.5  $\mu\text{M}$  BIO or **(Q)** 1  
585  $\mu\text{M}$  CHIR99021. **(R)** Quantification of the percentage migratory neural crest cells with a  
586 positive (white arrow), compromised (open arrowhead), or negative Abi1-positive

587 lamellipodia at their leading edge. Data presented as mean  $\pm$  SEM. DMSO: n=42 cells; 2h  
588 BIO: n=40 cells; 2h CHIR99021: n=39 cells analysed, over 2 independent experiments. \*\*\* p  
589 < 0.001, \* p < 0.05, chi-squared test, scale bar 20  $\mu$ m. **(S-U)** Lpd immunostaining of fixed  
590 migratory cranial neural crest cells, cultured from CD1 WT E8.5 embryos, treated for 2 hours  
591 with **(S)** DMSO control, **(T)** 0.5  $\mu$ M BIO or **(U)** 1  $\mu$ M CHIR99021. Scale bar 20  $\mu$ m. **(V)**  
592 Quantification of the percentage migratory neural crest cells with a positive (white arrow),  
593 compromised (open arrowhead), or negative Lpd-positive lamellipodia at their leading edge,  
594 following 2 hour treatment with DMSO, BIO or CHIR99021. Data presented as mean  $\pm$  SEM.  
595 DMSO control: n=78 cells; 2h BIO: n=83 cells; 2h CHIR99021: n=60 cells analysed, over 3  
596 independent experiments. \*\*\*\* p < 0.0001, chi-squared test. For Lpd immunostaining  
597 following 24 hour GSK3 inhibition, see **(Supplementary Figure 1)**.

598

599 **Figure 3. Genetic deletion of *Lpd* prevents lamellipodia formation and reduces the**  
600 **overall migration efficiency of cranial neural crest cells *ex vivo*. (A-C)** Representative  
601 stills from 10x magnification phase-contrast time-lapse imaging of E8.5 **(A)** *Wnt1::cre; Lpd<sup>+/+</sup>*,  
602 **(B)** *Wnt1::cre; Lpd<sup>fl/fl</sup>*, and **(C)** *Wnt1::cre; Lpd<sup>fl/fl</sup>* neural crest explant cultures, imaged for 18  
603 hours (1 frame/ 5 min) (see **Supplementary Movie 6**). Scale bar 100  $\mu$ m. **(A'-C')** Trajectory  
604 plots of 10 migratory neural crest cells tracked through time-lapse imaging for **(A-C)**. **(D-F)**  
605 Quantification of **(D)** Mean Track Speed (MTS), **(E)** Mean Squared Displacement (MSD),  
606 and **(F)** direction autocorrelation of migratory neural crest cells. For MTS calculations, each  
607 dot represents the mean speed of 10 neural crest cells imaged from the same explant. Lpd  
608 WT: n=11 explants, 110 cells tracked; Lpd Het: n=15 explants, 150 cells tracked; Lpd KO:  
609 n=13 explants, 130 cells tracked, over 4 independent experiments. \*\*\*\* p < 0.0001, \*\*\* p <  
610 0.001, \* p < 0.05, ns non-significant, one-way ANOVA, Tukey's multiple comparisons test.  
611 For direction autocorrelation measures,  $\Delta t = 1$ , TR = 4 (20 min); see Materials & Methods for  
612 details. **(G-I)** Colour-coded time projection stills of 60x magnification time-lapse imaging (10  
613 min movies, 1 frame/ 5 seconds) of migratory neural crest cells, cultured from E8.5 **(G)**  
614 *Wnt1::cre; Lpd<sup>+/+</sup>; LifeAct-EGFP*, **(H)** *Wnt1::cre; Lpd<sup>fl/fl</sup>; LifeAct-EGFP*, and **(I)** *Wnt1::cre;*



615 *Lpd<sup>fl/fl</sup>*; *LifeAct-EGFP* embryos (see **Supplementary Movie 7**). Open arrowhead: membrane  
616 ruffles; asterisk (\*): dynamic filopodia. Scale bar 20  $\mu\text{m}$ . **(J-K)** Quantification of neural crest  
617 **(J)** cell circularity and **(K)** filopodia number per 5000  $\mu\text{m}^2$  (approximate average neural crest  
618 cell area *ex vivo*). Leading edge protrusions were included in cell circularity measurements.  
619 *Lpd* WT: n=68 cells; *Lpd* Het: n=70 cells; *Lpd* KO: n=59 cells, analysed over 3 independent  
620 experiments. \*\*\*\*  $p < 0.0001$ , \*\*  $p < 0.01$ , \*  $p < 0.05$ , ns non-significant, one-way ANOVA,  
621 Tukey's multiple comparisons test. **(L-N)** *Abi1* immunostaining of fixed migratory neural crest  
622 cells, cultured from **(L)** *Wnt1::cre; Lpd<sup>+/+</sup>; LifeAct-EGFP*, **(M)** *Wnt1::cre; Lpd<sup>+/fl</sup>; LifeAct-EGFP*,  
623 and **(N)** *Wnt1::cre; Lpd<sup>fl/fl</sup>; LifeAct-EGFP* E8.5 embryos. Scale bar 20  $\mu\text{m}$ . **(O)** Quantification  
624 of the percentage migratory neural crest cells with a continuous *Abi1*-positive lamellipodium  
625 (positive), a discontinuous *Abi1*-labelled lamellipodium (compromised) or absent *Abi1*-  
626 labelled lamellipodium (negative). Data presented as mean  $\pm$  SEM. *Lpd* WT: n=48 cells; *Lpd*  
627 Het: n=97 cells; *Lpd* KO: n=71 cells, analysed over 3 independent experiments. \*\*\*\*  $p <$   
628 0.0001, chi-squared test.

629

630 **Figure 4. Genetic deletion of *Lpd* increases the number of filopodia protrusions in**  
631 **cranial neural crest cells *in vivo*. (A-C)** Maximum intensity projections of E8.75 (6-10  
632 somite stage) **(A)** *Wnt1::cre; Lpd<sup>+/+</sup>; Rosa26<sup>MTMG</sup>*, **(B)** *Wnt1::cre; Lpd<sup>+/fl</sup>; Rosa26<sup>MTMG</sup>* and **(C)**  
633 *Wnt1::cre; Lpd<sup>fl/fl</sup>; Rosa26<sup>MTMG</sup>* embryos, whose *Wnt1::cre*-driven membrane-GFP expression  
634 has been retrieved using an anti-GFP antibody. Scale bar 500  $\mu\text{m}$ . Dashed box indicates  
635 imaging region of **(A'-C')**. Pharyngeal arch-1 (PA1), yellow arrowhead), PA2 (white  
636 arrowhead), more posterior cardiac/ vagal regions (\*). **(A'-C')** Maximum intensity projections  
637 of the neural crest stream migrating towards PA1 (70  $\mu\text{m}$  z-stacks). Scale bar 50  $\mu\text{m}$ . **(A''-**  
638 **C'')** Single z-stack optical slices from neuroepithelium-adjacent locations **(A'-C')**. Scale bar:  
639 10  $\mu\text{m}$ . **(D-F)** Quantification of **(D)** cell area, **(E)** cell circularity and **(F)** filopodia number per  
640 100  $\mu\text{m}^2$ . Each dot represents one cell (*Lpd* WT: N = 70, *Lpd* Het: N = 53, *Lpd* KO: N = 109),  
641 from at least 2 embryos per genotype over 3 independent experiments. \*\*  $p < 0.01$ , \*\*\*  $p <$   
642 0.001, \*\*\*\*  $p < 0.0001$ , ns non-significant, one-way ANOVA and Tukey's multiple

643 comparison's test. **(G-H)** Maximum intensity projection images of **(G)** *Wnt1::cre; Lpd<sup>+/+</sup>*;  
644 *Rosa26<sup>MTMG</sup>* and **(H)** *Wnt1::cre; Lpd<sup>fl/fl</sup>; Rosa26<sup>MTMG</sup>* E9.5 embryos. Scale bar 500  $\mu\text{m}$ . PA1:  
645 yellow arrowhead, PA2 (white arrowhead), cardiac/ vagal regions (\*), trunk neural crest  
646 streams (open arrowhead). **(I-J)** Maximum projections of transverse sections through the  
647 head of E9.5 **(I)** *Wnt1::cre; Lpd<sup>+/+</sup>; LifeAct-EGFP* or **(J)** *Wnt1::cre; Lpd<sup>fl/fl</sup>; LifeAct-EGFP*  
648 embryos. *Wnt1::cre*-driven LifeAct-EGFP (green) marks neural crest contributions, and DAPI  
649 (blue) marks nuclei. Scale bar 100  $\mu\text{m}$ . **(I'-J')** 60x magnification (2x zoom) maximum  
650 projections of **(I)** and **(J)**, indicated by a white dotted box. Scale bar 20 $\mu\text{m}$ . **(K-L)**  
651 Quantification of neural crest cell circularity, at **(K)** the edge of the neural crest stream or **(L)**  
652 within the stream. Leading edge protrusions including filopodia were included in the cell  
653 circularity measurements. **(M-N)** Quantification of filopodial protrusions/100  $\mu\text{m}^2$ , at **(M)** the  
654 edge of the stream or **(N)** within the stream. Each dot represents one cell (edge cells: Lpd  
655 WT: N = 35, Lpd KO: N = 25; inner-stream cells: Lpd WT: N = 43, Lpd KO: N = 60) analysed  
656 over 3 independent experiments. \*\*  $p < 0.01$ , \*\*\*  $p < 0.001$ , ns non-significant, unpaired t  
657 test.

658

659 **Figure 5. GSK3 phosphorylates Lpd to increase Lpd interaction with Scar/WAVE, and**  
660 **reduces interaction with Ena/VASP proteins, VASP and Mena. (A)** HA-tagged, dominant-  
661 active (DA) GSK3 $\beta$  (DA-GSK3 $\beta$ -HA) co-immunoprecipitation with Lpd-EGFP in HEK293FT  
662 cells. EGFP-Trap pulldowns were performed from cell lysates followed by western blotting  
663 and probing with anti-EGFP, anti-HA, anti-phospho-serine/threonine (pS/T) and anti-  
664 phospho-threonine (pT) antibodies. Blots are representative of 3 independent experiments.  
665 **(B)** Schematic representation of Lpd protein domain structure. RA: Ras-association domain,  
666 PH: Pleckstrin homology domain, Proline: proline-rich region, FP4: FPPPP motif (Ena/VASP  
667 binding sites). GSK3 $\beta$  phosphorylates Lpd at S1066, S1069 and S1071 within Lpd FP4-4  
668 motif, an Ena/VASP binding site, and T1123 within Abi1 binding site 2, marked in bold  
669 (yellow boxes). **(C)** Summary table of differentially phosphorylated serine-threonine residues

670 on Lpd in the presence or absence of GSK3 $\beta$ . Column 1: Phosphorylated Lpd S/T residues  
671 with Lpd-EGFP overexpression. Column 2: Phosphorylated Lpd S/T residues with inhibition  
672 of GSK3 and Lpd-EGFP overexpression. Column 3: Phosphorylated Lpd S/T residues with  
673 co-expression of DA-GSK3 $\beta$ -HA and Lpd-EGFP. Yellow boxes: GSK3 phosphorylation sites  
674 of interest, grey boxes: non-phosphorylated residues. **(D)** DA-GSK3 $\beta$ -HA increases the co-  
675 immunoprecipitation of myc-tagged Scar/WAVE complex components with Lpd-EGFP in  
676 HEK293FT cells. Blots were probed for anti-myc, anti-HA and anti-EGFP, and are  
677 representative of 3 independent experiments. **(E)** DA-GSK3 $\beta$ -HA reduces the co-  
678 immunoprecipitation of myc-tagged Ena/VASP proteins, myc-VASP and myc-Mena, with  
679 Lpd-EGFP in HEK293FT cells. Blots were probed for anti-myc, anti-HA and anti-EGFP, and  
680 are representative of 3 independent experiments. For the lysate control blot, see  
681 **(Supplementary Figure 4)**. **(F-H)** Quantification of normalised pixel intensity of **(F)** myc-  
682 VASP, **(G)** myc-Mena and **(H)** DA-GSK3 $\beta$ -HA, normalised to Lpd-EGFP co-  
683 immunoprecipitation band intensity. \*\*\* p < 0.001, \*\* p < 0.01, ns non-significant, unpaired t-  
684 test. Each dot represents 1 independent experiment (n=3).

685

686 **Figure 6. *Lpd* deletion and GSK3 inhibition mislocalise Ena/VASP proteins to mature**  
687 **focal adhesions at the front of mouse cranial neural crest cells. (A-C)** Mena  
688 immunostaining of fixed migratory cranial neural crest cells, cultured from E8.5 **(A)**  
689 *Wnt1::cre; Lpd<sup>+/+</sup>; LifeAct-EGFP*, **(B)** *Wnt1::cre; Lpd<sup>fl/fl</sup>; LifeAct-EGFP*, and **(C)** *Wnt1::cre;*  
690 *Lpd<sup>fl/fl</sup>; LifeAct-EGFP* embryos. **(A'-C')** Merged images of  $\alpha$ -Mena (magenta) and LifeAct-  
691 EGFP (green). Scale bar 20  $\mu$ m. **(D)** Quantification of the percentage neural crest cells with  
692 Mena localisation to the lamellipodium. Data presented as mean  $\pm$  SEM, and analysed using  
693 a chi-squared test. **(E-F)** Quantification of the average **(E)** Mena-positive focal adhesion  
694 number/ 100  $\mu$ m<sup>2</sup>, and **(F)** focal adhesion area in *Lpd* wild-type, conditional heterozygous  
695 and homozygous knockout cranial neural crest cells. **(G)** Segmentation strategy used to sub-  
696 classify Mena-positive focal adhesions according to their localisation to the front, middle and

697 back thirds of cells. **(H-I)** Quantification of **(H)** average Mena-positive focal adhesion number/  
698  $100 \mu\text{m}^2$  and **(I)** average focal adhesion area within the front third of cells. **(J-K)**  
699 Quantification of **(J)** average Mena-positive focal adhesion number/  $100 \mu\text{m}^2$  and **(K)**  
700 average focal adhesion area within the back third of cells. Each dot represents one cell. \*\*\*  $p$   
701  $< 0.001$ , \*  $p < 0.05$ , ns non-significant, one-way ANOVA, Tukey's multiple comparisons test.  
702 Lpd WT:  $N = 48$ , Lpd Het:  $N = 124$ , Lpd KO:  $N = 72$ , over 3 independent experiments. **(L-N')**  
703 Lpd (L-N) and Mena (L'-N') co-immunostaining of fixed migratory cranial neural crest cells,  
704 cultured from E8.5 WT embryos, treated with **(L-L')** DMSO, or the GSK3 inhibitor BIO, for  
705 **(M-M')** 2 hours or **(N-N')** 24 hours prior to fixation. For immunofluorescence images of Lpd-  
706 Mena treated with CHIR99021, see **(Supplementary Figure 5)**. **(O-P)** Quantification of the  
707 percentage neural crest cells with Mena localisation to the lamellipodium. Data presented as  
708 mean  $\pm$  SEM. \*\*\*\*  $p < 0.0001$ , analysed using a chi-squared test ( $n=3$ ). **(Q-T)** Quantification  
709 of the average Mena-positive **(Q,S)** focal adhesion number/  $100 \mu\text{m}^2$  and **(R,T)** focal  
710 adhesion area in the whole cell of DMSO control, BIO-treated **(Q-R)** or CHIR99021-treated  
711 **(S-T)** cranial neural crest cells, 2 or 24 hours prior to fixation. Each dot represents one cell,  
712 from 3 independent experiments. \*\*\*\*  $p < 0.0001$ , \*\*  $p < 0.01$ , \*  $p < 0.05$ , ns non-significant,  
713 one-way ANOVA, Tukey's multiple comparisons test. DMSO:  $N = 99$ , 2h BIO:  $N = 79$ , 24h  
714 BIO:  $N = 61$ , 2h CHIR99021:  $N = 64$ , 24h CHIR99021:  $N = 37$  cells.

715

716 **Figure 7. Lpd inhibits nascent adhesion maturation at the leading edge of mouse**  
717 **cranial neural crest cells. (A-C)** Vinculin immunostaining of fixed migratory cranial neural  
718 crest cells, cultured from E8.5 **(A)** *Wnt1::cre; Lpd<sup>+/+</sup>; LifeAct-EGFP*, **(B)** *Wnt1::cre; Lpd<sup>+/fl</sup>;*  
719 *LifeAct-EGFP* and **(C)** *Wnt1::cre; Lpd<sup>fl/fl</sup>; LifeAct-EGFP* embryos. **(A'-C')** Merged  
720 immunostaining of Vinculin (magenta) with LifeAct-EGFP fusion protein (green). Scale bar  
721  $20 \mu\text{m}$ . **(D-G)** Quantification of Vinculin-positive average **(D)** focal adhesion number/  $100$   
722  $\mu\text{m}^2$ , **(E)** focal adhesion area, **(F)** focal adhesion length and **(G)** focal adhesion width in *Lpd*  
723 wildtype, *Lpd* heterozygous and homozygous knockout cells. **(H-J)** Zyxin immunostaining of  
724 fixed migratory neural crest cells, cultured from E8.5 **(H)** *Wnt1::cre; Lpd<sup>+/+</sup>; LifeAct-EGFP*, **(I)**

725 *Wnt1::cre; Lpd<sup>+/fl</sup>; LifeAct-EGFP* and **(J)** *Wnt1::cre; Lpd<sup>fl/fl</sup>; LifeAct-EGFP* embryos. **(H'-J')**  
726 Merged immunostaining of zyxin (magenta) with LifeAct-EGFP fusion protein (green). Scale  
727 bar 20  $\mu\text{m}$ . **(K-N)** Quantification of Zyxin-positive average **(K)** focal adhesion number/ 100  
728  $\mu\text{m}^2$ , **(L)** focal adhesion area, **(M)** focal adhesion length and **(N)** focal adhesion width in *Lpd*  
729 wild-type, *Lpd* heterozygous and homozygous knockout cells. Each dot represents one cell  
730 (*Lpd* WT: N = 42, *Lpd* Het: N = 52, *Lpd* KO: N = 73), over at least 3 independent  
731 experiments. **(O)** Segmentation strategy used to sub-classify Zyxin-positive focal adhesions  
732 according to their localisation to the front, middle and back thirds of neural crest cells. **(P)**  
733 Quantification of zyxin-positive focal adhesion localisation to the front, middle or back thirds  
734 of *Lpd* wild-type, heterozygous and homozygous knockout neural crest cells. Data presented  
735 as mean  $\pm$  SEM. \*\*\*\*  $p < 0.0001$ , \*\*  $p < 0.01$ , analysed using a chi-squared test. **(Q-T)**  
736 Quantification of zyxin-positive average **(Q)** focal adhesion number/ 100  $\mu\text{m}^2$ , **(R)** focal  
737 adhesion area, **(S)** focal adhesion length and **(T)** focal adhesion width in the front third of  
738 *Lpd* wild-type, heterozygous and homozygous knockout cells. **(U-X)** Quantification of zyxin-  
739 positive average **(U)** focal adhesion number/ 100  $\mu\text{m}^2$ , **(V)** focal adhesion area, **(W)** focal  
740 adhesion length and **(X)** focal adhesion width in the back third of cells. Each dot represents  
741 one cell (*Lpd* WT: N = 58, *Lpd* Het: N = 78, *Lpd* KO: N = 44), over at least 3 independent  
742 experiments. \*\*\*\*  $p < 0.0001$ , \*\*\*  $p < 0.001$ , \*\*  $p < 0.01$ , \*  $p < 0.05$ , ns non-significant, one-  
743 way ANOVA, Tukey's multiple comparisons test.

744

## 745 **STAR METHODS**

### 746 KEY RESOURCE TABLE

747 (See separate document as requested).

748

### 749 LEAD CONTACT AND MATERIALS AVAILABILITY

750 Further information and requests for resources and reagents may be directed to and will be  
751 fulfilled by the Lead Contacts: Karen J. Liu ([karen.liu@kcl.ac.uk](mailto:karen.liu@kcl.ac.uk)) and Matthias Krause  
752 ([matthias.krause@kcl.ac.uk](mailto:matthias.krause@kcl.ac.uk)).

753

754 EXPERIMENTAL MODEL AND SUBJECT DETAILS

755 **Genetically-Modified Mouse Models**

756 All animal work was approved by King's College London Ethical Review Process and  
757 performed at King's College London in accordance with UK Home Office Personal License  
758 I0DE37907 (LD) and Project Licenses P8D5E2773 (KJL) and PPL9218930 (Julie Keeble).  
759 *Tg(Wnt1::cre)11Rth* mice previously described in<sup>32</sup> were crossed with *Lpd* floxed mice  
760 (*Raph1<sup>tm1/1Makr</sup>*)<sup>16</sup>. The following Cre-responsive reporters were used, as outlined in figure  
761 legends: *LifeAct-EGFP (Tg(CAG-EGFP)#Rows)*, which encodes a fluorescent reporter of  
762 filamentous actin dynamics<sup>31</sup>, and *Rosa26R<sup>mtmg</sup> (GT(Rosa)R26Sor<sup>Tm4</sup>(ACTB-tdTomato-EGFP)Luo)*,  
763 whereby a membrane tdTomato-polyA is flanked by loxP sites followed by a membrane-  
764 EGFP in the Rosa26 locus, which encodes plasma membrane dynamics<sup>30</sup>. All mouse lines  
765 were bred on an outcrossed CD1 background. Mice were genotyped as described in original  
766 publications. Gestational ages were determined based on the observation of vaginal plugs,  
767 which was considered E0.5. Embryos were further staged by determining somite stage after  
768 dissection. For each experiment, litter-matched controls were used unless otherwise noted.

769

770 **Embryonic Dissections**

771 At days corresponding to embryonic day E8.5 or E9.5, the mother was sacrificed, and her  
772 uterus dissected out and immediately placed into ice cold 1x PBS. In a 10 cm<sup>2</sup> dish, the  
773 mesometrium of the uterus was cut, and the muscle layer removed to separate out individual  
774 decidua. The decidua tissue was peeled back and extra-embryonic tissues removed. E8.5  
775 and E9.5 embryos were transferred into a 24-well tissue culture plate for fixation (see  
776 Method Details).

777

778 **Live E8.5 Embryo Culture**

779 *Wnt1::cre; Rosa26R<sup>mtmg</sup>* E8.5 embryos (6-10 somite stage) were dissected out from the  
780 decidua of the mother's uterus, and the extra-embryonic membranes removed. The embryos

781 were transferred into a 35 mm coverslip glass-bottomed dish (Ibidi) and maintained in culture  
782 media (Dulbecco's modified Eagle's medium (DMEM) High Glucose (phenol red-free)  
783 (Sigma), 50% rat serum (Envigo)) and incubated at 37°C and 5% CO<sub>2</sub>. *Wnt1::cre*-positive  
784 embryos expressing membrane-EGFP (mGFP) in the neural crest domains, as determined  
785 using an epifluorescent lamp attachment to the dissection stereoscope, were taken forward  
786 for live imaging. Embryos were maintained in culture for a maximum of 5-6 hours prior to  
787 fixation.

788

### 789 **Primary Neural Crest Explant Cultures**

790 The full method of this protocol can be found in<sup>33</sup>. Briefly, embryonic day 8.5 (E8.5) mouse  
791 embryos were dissected out from the decidua of the mother's uterus, and extra-embryonic  
792 membranes removed. The head fold was removed from the body of the embryo, at an  
793 anteroposterior position just anterior to the heart (see Figure 2A). The underlying mesoderm  
794 beneath the neural plate border (NPB) was scraped away and the cleaned NPB divided  
795 down the anteroposterior axis so that each side of the neural plate border could be plated  
796 individually. Using a glass Pasteur pipette, the NPB was transferred into coverslip-bottomed  
797 24-well plates (Ibidi). Each well was pre-coated with 1 µg/ml fibronectin (Sigma) and the  
798 explants were cultured in neural crest media (Dulbecco's modified Eagle's medium (DMEM)-  
799 high glucose (Sigma), 15% embryonic stem cell-grade foetal bovine serum (Sigma), 0.1 mM  
800 minimum essential medium nonessential amino acids (Gibco), 1 mM sodium pyruvate  
801 (Sigma), 55 µM β-Mercaptoethanol (Gibco), 100 units/mL penicillin, 100 units/mL  
802 streptomycin and 2 mM L-Glutamine, conditioned by growth-inhibited STO feeder cells  
803 (ATCC) and supplemented with 25 ng/µl basic-FGF (R&D Systems) and 1000 U LIF  
804 (ESGRO by Millipore) and incubated overnight at 37°C and 5% CO<sub>2</sub>. The outgrowth of the  
805 pre-migratory and migratory neural crest cell populations is visible by 24 hours following  
806 dissection.

807

808 **Human Cell Lines**

809 HEK293FT cells (Thermo Fisher) were cultured in high-glucose Dulbecco's modified Eagle's  
810 medium (DMEM) (Sigma) supplemented with 10% of foetal bovine serum (FBS, Gibco), 2 or  
811 4 mM L-glutamine, 1 unit/ml penicillin and 100 µg/ml streptomycin. Cells were maintained in  
812 75 cm<sup>2</sup> or 175 cm<sup>2</sup> tissue culture flasks (Greiner) and incubated at 37°C and 10% CO<sub>2</sub>.

813

814 **METHODS DETAILS**

815 **Molecular Biology and Transfections**

816 The following materials were used: pBSII KS- (Agilent Technologies), pEGFP-N1 (Clontech),  
817 pDONR221-WAVE-2 (German Resource Centre for Genome Research). Sra1 (CYFIP1;  
818 HsCD00042136), Nap1 (NCKAP1; HsCD00045562) and HSPC300 (C3orf10;  
819 HsCD00045008) (DNASU repository) in pENTR233 or pDONR221. hsAbi1d (BC024254;  
820 Geneservice) full-length was cloned into pENTR11 (Invitrogen)<sup>16</sup>. pMyc-VASP, pMyc-Mena  
821 and pMyc-EVL were cloned by PCR amplification of murine VASP/Mena/EVL cDNA from  
822 existing plasmids using primers (listed in: Key Resource Table) into pENTR3C (Invitrogen).  
823 Scar/WAVE and Ena/VASP cDNAs were transferred to pRK5-myc-DEST (kind gift of Jean-  
824 Paul Borg, Marseille Cancer Research Centre, France) by Gateway® cloning for CMV-  
825 driven expression in mammalian cells. Human Lpd (AY494951) was amplified and cloned  
826 into pENTR3C (Invitrogen) and transferred to the pCAG-DEST-EGFP mammalian  
827 expression vector using Gateway® recombination<sup>17</sup>. HA GSK3 beta S9A pcDNA3 was a gift  
828 from Jim Woodgett (Addgene plasmid # 14754).

829

830 HEK293FT cells (Thermo Fisher) were transiently transfected using Lipofectamine 2000  
831 (Invitrogen) according to manufacturer's instructions, branched Polyethylenimine (PEI)  
832 (Sigma) or calcium phosphate. Lipofectamine 2000 or branched PEI (Sigma) were used for  
833 small-scale transfections: 1 x10<sup>6</sup> HEK293FT cells were transfected with 4 µg of the following  
834 plasmids: pCAG-Lpd-EGFP, pEGFP-N1, pBSII KS-, pCDNA-hsS9A-GSK3β-HA, pMyc-



835 VASP, pMyc-Mena, pMyc-EVL, pMyc-Abi-1D, pMyc-WAVE2, pMyc-Sra-1, pMyc-Nap1 and  
836 pMyc-HSPC300. For PEI-based transfection, 4 µg of DNA and 8 µl of PEI was separately  
837 diluted in 100 µl OptiMEM. The solutions were flick mixed and incubated at room-  
838 temperature for 5 min. The OptiMEM-PEI mix was added to the Opti-MEM DNA mix and  
839 incubated at room temperature for 20 min. The transfection mix was added dropwise to cells  
840 and incubated at 37°C and 10% CO<sub>2</sub> for 24h prior to cell lysis. Calcium phosphate  
841 transfection: 12 x10<sup>6</sup> cells were transfected with 50 µg of the following plasmids: pCAG-Lpd-  
842 EGFP, pEGFP-N1, pBSII KS-, pCDNA-hsS9A-GSK3β-HA. Briefly, 1.25 M CaCl<sub>2</sub> was added  
843 to the DNA solution. 2x HBS solution (50mM HEPES pH 7.05, 10 mM KCl, 12 mM Dextrose,  
844 280 mM NaCl, 1.5 mM Na<sub>2</sub>HPO<sub>4</sub>) was added dropwise to the CaCl<sub>2</sub>-DNA mix with bubbling.  
845 The transfection mix was added dropwise to cells, before being replaced with fresh media  
846 3.5-4 hours later. HEK293FT cells were harvested 48 hours after transfection.

847

#### 848 **Pharmacological Inhibitor Treatments**

849 The competitive pharmacological inhibitors of GSK3α/β, 6-bromoindirubin-3'-oxime (BIO,  
850 Sigma) and CHIR99021 (Tocris Bioscience), were re-suspended in dimethyl sulphoxide  
851 (DMSO, Sigma) at a stock concentration of 14 mM and 10 mM, respectively. The inhibitors  
852 were further diluted in standard cell media to final working concentration. HEK293FT cells  
853 were treated with 1 µM BIO for 24 hours prior to cell lysis. Neural crest explant cultures were  
854 treated with DMSO vehicle control, 0.5 µM BIO or 1 µM CHIR99021 for 2 hours or 24 hours  
855 prior to fixation. For drug rescue experiments, neural crest explants were treated with BIO for  
856 2 hours, washed twice with 1x PBS and fresh neural crest media added for the set time  
857 stated in the figure legends prior to fixation.

858

#### 859 **Tissue Fixation**

860 Wholemout E8.5 and E9.5 embryos were fixed in ice-cold 4% paraformaldehyde (PFA) in  
861 PBS overnight with gentle rocking. The following day, the PFA was removed and 3x 15 min

862 1x PBS washes completed. Neural crest explant cultures were fixed 48 hours after  
863 dissection with 4% paraformaldehyde (PFA)-PHEM (60 mM PIPES, 25 mM HEPES, 10 mM  
864 EGTA, 2 mM MgCl<sub>2</sub>, 0.12 M sucrose) for 10 minutes at room temperature.

865

### 866 **Tissue Processing for Cryosectioning**

867 Following their dissection and fixation, E9.5 embryos were transferred into graded sucrose  
868 solutions for cryoprotection. Firstly, samples were incubated in 30% sucrose-PBS solution at  
869 4°C overnight, followed by a subsequent overnight 4°C incubation in 30% sucrose-OCT  
870 (Optimal Cutting Temperature) solution (CellPath). Once equilibrated, the E9.5 embryos  
871 were anteriorly embedded into OCT blocks and snap frozen using dry ice and 100% ethanol.  
872 An OTF-5000 Cryostat (Bright), set to -16°C specimen temperature and -24°C chamber  
873 temperature, was used to section the cryo-blocks (14 µm thickness). Cryosections were  
874 sequentially mounted over two SuperFrost-Plus® glass slides (Thermo Fisher) and stored at  
875 -80°C.

876

### 877 **Immunofluorescence**

878 Wholemound embryo immunofluorescence: E8.5 and E9.5 embryos were permeabilised in  
879 0.5% Triton-X-100-PBS at room temperature. Embryos were blocked in 10% goat serum-  
880 0.1% Tween 20-PBS at 4°C for 24-48 hours, prior to incubation with primary antibody diluted  
881 in blocking buffer at 4°C for 24 hours. Samples were washed with blocking buffer at room  
882 temperature before being incubated with Alexa488-conjugated secondary antibodies and  
883 Hoechst at 4°C for 24 hours. The samples were placed into Citifluor (50% glycerol anti-fade  
884 mounting media) to clear at 4°C for 2 days and 5 days, for E8.5 and E9.5, respectively.

885

886 Cryosection immunofluorescence: slides were washed with 0.1% Triton-X-100-PBS in a  
887 coplin jar to remove any remaining OCT, and the perimeter of the slide outlined using an  
888 ImmEdge™ hydrophobic barrier pen (Vector Labs). The sections were blocked in 10%  
889 normal goat serum-1% BSA-0.1% Triton-X-100-PBS for 1 hour at room temperature, before

890 being incubated with a chicken anti-EGFP primary antibody diluted to 1:500 in blocking  
891 buffer at room temperature for 1 hour. The slides were subsequently washed and incubated  
892 with Alexa488- or Alexa568-conjugated secondary antibodies diluted 1:400 in blocking buffer  
893 at room temperature for 1 hour. The slides were washed, and a coverslip mounted over the  
894 samples using Fluoroshield mounting medium with DAPI (Abcam).

895

896 Neural crest explants were permeabilised at room temperature for 2 min with 0.1% Triton-X-  
897 100 in cytoskeletal-(c)TBS buffer (200 mM Tris-HCl, 1.54 M NaCl, 20 mM EGTA, 20 mM  
898  $MgCl_2 \times 6H_2O$  pH 7.5), before being blocked overnight at 4°C (10% normal goat serum-10%  
899 BSA-cTBS buffer). Alternatively, the explants were permeabilised with 0.05% saponin as  
900 part of the blocking buffer and incubated overnight at 4°C. The samples were incubated with  
901 primary antibodies diluted in 1% BSA-cTBS for 1 hour at room temperature, followed by 3x  
902 cTBS washes and incubation with secondary antibodies diluted in 1% BSA-cTBS for 1 hour  
903 at room temperature. Nuclei were stained with 1:1000 dilution of Hoechst 33342 (20 mg/ml  
904 stock concentration) as part of the secondary antibody mix. For coverslip  
905 immunofluorescence samples, coverslips were mounted onto SUPERFROST® microscope  
906 slides (Thermo Fisher) with Fluoroshield Mounting Medium with DAPI (Abcam).

907

#### 908 **VASP Monoclonal Antibody Production**

909 His-tagged full length murine VASP was produced in insect cells using the “Bac-to-Bac”  
910 baculovirus expression system according to the protocols supplied by the manufacturer  
911 (GIBCO-BRL) and purified on cobalt beads (BD Talon resins, BD Biosciences Clontech).  
912 These recombinant proteins were used to produce monoclonal antibodies in VASP knockout  
913 mice as described<sup>98</sup>. Hybridoma supernatants were screened by ELISA on recombinant,  
914 purified VASP and on western blots of extracts of Swiss 3T3 fibroblasts. One hybridoma was  
915 chosen and subcloned twice. This monoclonal antibody was designated B296B5H12 and  
916 recognises VASP of murine origin.

917

## 918 **Pulldowns and Western Blotting**

919 HEK293FT cells were lysed on ice for 15 min using glutathione S-transferase (GST) buffer  
920 (50 mM Tris-HCl pH 7.4, 200 mM NaCl, 1% NP-40, 2 mM MgCl<sub>2</sub>, 10% glycerol)  
921 supplemented with NaF (10 mM final concentration), Na<sub>3</sub>VO<sub>4</sub> (1 mM final concentration) and  
922 a complete protease inhibitor mini tablet (Roche). Samples were centrifuged at 4°C for 10  
923 min. Protein concentration was determined using a Pierce BCA Assay (Thermo Fisher). 400  
924 µg protein was incubated on pre-blocked (1% BSA-GST buffer) GFP-Trap® (Chromatek) or  
925 GFP-Selector beads (NanoTag) at 4°C for 2 hours. Pulldown samples were washed and re-  
926 suspended in 2x sample buffer (100 mM Tris-HCl (pH 6.8), 4% SDS, 12% glycerol, 4 mM  
927 DTT, 0.02% bromophenol blue), and run alongside 20 µg lysate and pEqGOLD Protein  
928 Marker V (VWR International) on 10% SDS-PAGE gels (stacking gel: 5% bis-acrylamide  
929 (30%), 125 mM Tris-HCl (pH 6.8), 0.1% SDS, 0.1% APS, 0.05% TEMED); separating gel:  
930 10% bis-acrylamide (30%), 400 mM Tris-HCl (pH 8.8), 0.1% SDS, 0.1% APS, 0.05%  
931 TEMED). Western blot transfer onto Immobilon PVDF membranes (EMD Millipore) was then  
932 completed: 100 V, 350 mA, 17 W for 1.5 hours. Membranes were blocked at 4°C overnight  
933 in 5% BSA-TBS-T (20 mM Tris-Base, 154 mM NaCl, 0.1% Tween-20, pH 7.6) and  
934 subsequently incubated at room temperature for 1h with primary antibodies, followed by  
935 washes and a further 1 hour with HRP-conjugated secondary antibodies (Cell Signalling  
936 Technology). Blots were washed and developed with the ECL Western Blotting Detection Kit  
937 (Bio-Rad Laboratories) and imaged using a Bio-Rad Imager and ImageLab software.  
938 Western blots were quantified using the pixel densitometry tool (FIJI/ImageJ). The profile  
939 plot for each western blot lane was generated and the area underneath the graph,  
940 representing the relative band density, was calculated and normalised to the pixel density of  
941 the Lpd-EGFP pulldown lane.

942

## 943 **Phosphorylation Analysis by Tandem Mass Spectrometry**

944 HEK293FT cells were transiently transfected with the following plasmids: Lpd (45 µg pCAG-  
945 Lpd-EGFP, 5 µg pBSII KS-), Lpd + BIO (45 µg pCAG-Lpd-EGFP, 5 µg pBSII KS-), Lpd +  
946 GSK3b (45 µg pCAG-Lpd-EGFP, 5 µg pCDNA3-hsS9A-GSK3b-HA) prior to cell lysis.  
947 Protein concentration was quantified and the samples incubated with pre-blocked (1% BSA-  
948 GST buffer) GFP-Trap® beads for 2 hours at 4°C for pulldown. Pulldown samples were re-  
949 suspended in 2x sample buffer (100 mM Tris-HCl (pH 6.8), 4% SDS, 12% glycerol, 10 mM  
950 DTT, 0.05% bromophenol blue), and run on 6% Novex WedgeWell™ Tris-Glycine mini  
951 protein gels at 225 V for 45 min before Colloidal Coomassie staining (Severn Biotech).  
952 Following de-staining (HPLC-grade water), the protein band corresponding to Lpd-EGFP  
953 (approximately 230 kDa) was excised and in gel digestions completed using a tri-enzyme  
954 mix (trypsin-chymotrypsin-AspN). Collision-induced dissociation (CID) / electron transfer  
955 dissociation (CID/ETD) tandem mass spectrometry was then performed. Chromatographic  
956 separation was completed using a U3000 UHPLC NanoLC system (Thermo Fisher).  
957 Peptides were resolved by reversed phase chromatography on a 75 µm C18 Pepmap  
958 column (50 cm length) using a three-step linear gradient of 80% acetonitrile in 0.1% formic  
959 acid. The gradient was delivered to elute the peptides at a flow rate of 250 nl/min over 60  
960 min starting at 5% B (0-5 minutes) and increasing solvent to 40% B (5-40 minutes) prior to a  
961 wash step at 99% B (40-45 minutes) followed by an equilibration step at 5% B (45-60  
962 minutes). The eluate was ionised by electrospray ionisation using an Orbitrap Fusion Lumos  
963 (Thermo Fisher) operating under Xcalibur v4.3. The instrument was first programmed to  
964 acquire using an Orbitrap-Ion Trap method by defining a 3 second cycle time between a full  
965 MS scan and MS/MS fragmentation by collision induced dissociation. Orbitrap spectra  
966 (FTMS1) were collected at a resolution of 120,000 over a scan range of m/z 375-1600 with  
967 an automatic gain control (AGC) setting of 4.0e5 (100%) with a maximum injection time of 35  
968 ms. Monoisotopic precursor ions were filtered using charge state (+2 to +7) with an intensity  
969 threshold set between 5.0e3 to 1.0e20 and a dynamic exclusion window of 35 seconds ± 10  
970 ppm. MS2 precursor ions were isolated in the quadrupole set to a mass width filter of 1.6  
971 m/z. Ion trap fragmentation spectra (ITMS2) were collected with an AGC target setting of

972 1.0e4 (100%) with a maximum injection time of 35 ms with CID collision energy set at 35%.  
973 Neutral loss scans were performed to trigger fragmentation in the presence of  
974 phosphorylation with simultaneous triggering of ETD fragmentation scans. Data processing  
975 and analysis was completed in Proteome Discoverer v2.5 with the .msf files uploaded in to  
976 Scaffold 5 for manual interpretation of MS/MS fragmentation spectra and site localisation.

977

#### 978 **Live embryo imaging: Protrusion dynamics**

979 Live imaging of *Wnt1::cre; Rosa26R<sup>mtmg</sup>* embryos was performed on a Nikon A1R inverted  
980 confocal microscope with an environmental chamber set to 37°C and 5% CO<sub>2</sub>. The E8.5  
981 embryos were maintained and positioned laterally in phenol red-free culture medium in 35  
982 mm coverslip glass-bottomed dishes (Ibidi) which were mounted onto the microscope.  
983 Embryos were located and oriented using the 488 nm emission laser at 10x magnification.  
984 Live imaging focused on those mGFP-positive neural crest cells delaminating and early  
985 emigrating away from the neural plate border, destined for pharyngeal arch 1. Live imaging  
986 was completed at 40x magnification at a z-depth of 40 µm, over 30 min (1 frame/ 45 sec) or  
987 at a z-depth of 24.5 µm, over 10 min (1 frame/ 20 sec).

988

#### 989 **Live cell imaging: Neural crest migration and protrusion dynamics**

990 Live imaging of neural crest migration was completed 24 hours after dissection on a  
991 widefield IX 81 microscope (Olympus), with a Solent Scientific incubation chamber (37°C;  
992 5% CO<sub>2</sub>), filter wheels (Sutter), an ASI X-Y stage, Cascade II 512B camera (Photometrics),  
993 and 4x UPlanFL, 10x UPlanFL, 60x Plan-Apochromat NA1.45, or 100x UPlan-Apochromat S  
994 NA 1.4 objective lenses, controlled by MetaMorph software. Lineage-labelled neural crest  
995 cells were located using the 488 nm filter from a Xenon white light source at 10x  
996 magnification, and the explants oriented so that the neural plate border was just outside the  
997 frame of imaging. Phase-contrast live imaging was then completed at 10x magnification,  
998 over 18 hours (1 frame/ 5 min). A minimum of two regions of interest (ROIs) were imaged

999 per explant and multi-well imaging was performed using an ASI x-y stage to capture the  
1000 same time intervals across genotypes or between drug conditions. Following live imaging,  
1001 the time-lapse movies were exported from the MetaMorph software and saved as TIFF  
1002 stacked (stk) files for downstream analysis.

1003

1004 Live imaging of protrusion dynamics of *Wnt1::cre; LifeAct-EGFP* migratory neural crest cells  
1005 were completed 36 hours after dissection on an IX 81 widefield epifluorescence microscope  
1006 (Olympus), with a Solent Scientific incubation chamber (37°C; 5% CO<sub>2</sub>), controlled by  
1007 MetaMorph software. Lineage-labelled neural crest cells were located using the 488 nm filter  
1008 from a Xenon white light source at 10x magnification. Imaging focused on LifeAct-EGFP-  
1009 expressing migratory neural crest cells at the explant edge. Live imaging was completed at  
1010 60x magnification, over 10 min (1 frame/ 5 seconds). 3 cells were imaged per explant, and  
1011 three biological repeats performed.

1012

### 1013 **Imaging: Fixed Immunofluorescence**

1014 Whollemount E8.5 and E9.5 embryos were imaged on an inverted Nikon A1R confocal  
1015 microscope. Low magnification (4x) images were acquired as z-stacks with 40 μm slice  
1016 interval (800 μm). High magnification (20x) images were acquired as z-stacks with 2μm slice  
1017 interval (80-100 μm). Cryosection slides were imaged on a Leica TCS SP5 DM16000  
1018 confocal microscope at 20x and 63x magnification (with 1x or 2x optical zoom). Z-stacks  
1019 were taken at 1 μm intervals through 14 μm tissue sections.

1020

1021 Neural crest explants were imaged on a widefield epifluorescence IX81 Olympus microscope  
1022 (Olympus), with a Solent Scientific incubation chamber (37°C; 5% CO<sub>2</sub>), filter wheels  
1023 (Sutter), an ASI X-Y stage, Cascade II 512B camera (Photometrics), and 4x UPlanFL, 10x  
1024 UPlanFL, 60x Plan-Apochromat NA1.45, or 100x UPlan-Apochromat S NA 1.4 objective  
1025 lenses, controlled by MetaMorph software. Lineage-labelled neural crest cells were located

1026 using the 488 nm filter from a Xenon white light source at 10x magnification. Imaging was  
1027 completed at 60x magnification, with equal exposure times used for all cells and conditions  
1028 imaged for a given experiment.

1029

### 1030 **Quantification of migration speed and persistence**

1031 Migratory cranial neural crest cells were manually tracked through the course of time-lapse  
1032 by following cell nuclear position using the Manual Tracking plugin (ImageJ/Fiji). 10 lineage-  
1033 labelled neural crest cells were tracked per explant, specifically those within the 2 most  
1034 outward rows of mesenchymal cells at the explant edge. Cell tracks were stopped  
1035 prematurely if cells underwent division or if they left the frame of imaging. Cell tracking  
1036 generated XY coordinates over time which were exported into Microsoft Excel. XY  
1037 coordinates were subsequently converted into matrix format using the “Convert ImageJ files  
1038 into .CEL format” script (Mathematica) for import into the Chemotaxis Analysis Notebook  
1039 v1.5 $\beta$  (Mathematica) to analyse mean track speed (MTS) (G. Dunn, King’s College London).  
1040 MTS is defined as the distance travelled by the neural crest cells over a set time ratio (TR),  
1041 averaged across the entire track length<sup>16,99</sup>. MTS is calculated as an average displacement  
1042 ( $d_n$ ) over dt, where n denotes which track interval (n = 1 indicates 5 min) and dt is the usable  
1043 time interval (dt = 5 min)<sup>16,99</sup>.

1044

1045 Mean squared displacement (MSD) is a speed-and persistence-dependent measure of the  
1046 area explored by cells over a set time<sup>34</sup>. Direction autocorrelation is a speed-independent  
1047 measure of cell directionality, through the calculation of how the angle of displacement  
1048 vectors correlate with themselves<sup>34</sup>. Quantification of MSD and direction autocorrelation  
1049 were calculated using the excel macros provided in<sup>34</sup>, according to the protocol provided.

1050

### 1051 **Quantification of Cell Morphology and Actin-based Protrusions**

1052 Fixed migratory neural crest cells from E8.5 *Wnt1::cre; LifeAct-EGFP* explant cultures (with  
1053 or without *Lpd knockout* or GSK3 inhibition) were manually outlined and masked by a



1054 blinded examiner using the LifeAct-EGFP fluorescence to define the cell edge (Freehand  
1055 Selection tool, ImageJ/FIJI). The cell area and circularity were calculated using the Analyse |  
1056 Measure function (ImageJ/FIJI). Manual filopodia counts were completed using the LifeAct-  
1057 EGFP fluorescence, the number of which were first normalised against the individual neural  
1058 crest cell area and then multiplied by either a factor of 100 (*in vivo* datasets) or 5000 (*ex vivo*  
1059 datasets) to generate filopodia number per 100 or 5000  $\mu\text{m}^2$ .

1060

### 1061 **Quantification of leading edge actin-associated protein localisation**

1062 Fixed migratory neural crest cells stained for Abi1, Lpd and Mena (568 nm filter) were  
1063 merged with their respective actin reporter, LifeAct-EGFP, image (488 nm filter) using  
1064 ImageJ/FIJI. A blinded examiner classified neural crest cells as having either a positive or  
1065 negative actin-associated protein stain localised (LifeAct-EGFP) at the lamellipodia edge. A  
1066 positive stain was classed as continuous staining of the actin-associated protein at the  
1067 lamellipodium. A compromised stain was classified as punctate protein localisation or  
1068 evidence for membrane ruffling. Filopodia or an absence of leading edge staining were  
1069 classified as negative. Data was presented as the percentage of cells with positive,  
1070 compromised or negative staining for the actin-associated protein at the leading edge  $\pm$   
1071 standard error of the mean (SEM).

1072

### 1073 **Quantification of focal adhesion protein localisation**

1074 Fixed migratory neural crest cells stained for Mena, vinculin or zyxin were manually masked  
1075 using the Freehand Selection Tool | Fit Spline in ImageJ/FIJI by a blinded examiner. For cell  
1076 third measurements (front, middle, back), neural crest cells were divided according to 1/3  
1077 cell area down the major axis of the cell, relative to the overall direction of migration. Manual  
1078 cell 1/3 masks were generated as above. The masked TIFF images were imported into the  
1079 Focal Adhesion Analysis Server (FAAS) (see Key Resource Table) and the detection  
1080 threshold (DT, standard deviation) and the minimum pixel size (MPS,  $\mu\text{m}$ ) set: Mena: DT 2,

1081 MPS 3; vinculin: DT 2.5, MPS 5; zyxin: DT 2.5, MPS 5). Optimisation of the detection  
1082 threshold and minimum pixel size was completed prior to analysis using a training data set.  
1083 Output measurements for number, area, length, and width of focal adhesions were exported  
1084 into Microsoft Excel and the mean of each parameter averaged per cell. Filopodia number  
1085 was normalised to a standardised area of 100  $\mu\text{m}^2$ .

1086

#### 1087 QUANTIFICATION AND STATISTICAL ANALYSIS

1088 Statistical analysis was performed in Prism v8 or v9 (GraphPad) using a Student's t-test,  
1089 one-way ANOVA with Tukey's multiple comparison's test, or chi-squared test (see figure  
1090 legends). P values < 0.05 were considered significant.

1091

#### 1092 DATA AND CODE AVAILABILITY

1093 The proteome data will be deposited on an appropriate repository.

1094

#### 1095 **SUPPLEMENTAL INFORMATION**

1096 (See separate document as requested).

1097

1098

#### 1099 REFERENCES

- 1100 1. Trainor, P.A. (2014). *Neural Crest Cells* (Elsevier) 10.1016/C2012-0-00698-9.
- 1101 2. Theveneau, E., and Mayor, R. (2012). Neural crest delamination and migration: From  
1102 epithelium-to-mesenchyme transition to collective cell migration. *Dev. Biol.* 366, 34–  
1103 54. 10.1016/j.ydbio.2011.12.041.
- 1104 3. Zhao, R., and Trainor, P.A. (2022). Epithelial to mesenchymal transition during  
1105 mammalian neural crest cell delamination. *Semin. Cell Dev. Biol.*  
1106 10.1016/j.semcd.2022.02.018.
- 1107 4. Osumi-Yamashita, N., Ninomiya, Y., Doi, H., and Eto, K. (1994). The contribution of  
1108 both forebrain and midbrain crest cells to the mesenchyme in the frontonasal mass of  
1109 mouse embryos. *Dev. Biol.* 164, 409–419. 10.1006/dbio.1994.1211.

- 1110 5. Scarpa, E., and Mayor, R. (2016). Collective cell migration in development. *J. Cell*  
1111 *Biol.* 212, 143–155. 10.1083/jcb.201508047.
- 1112 6. Simões-Costa, M., and Bronner, M.E. (2015). Establishing neural crest identity: a  
1113 gene regulatory recipe. *Development* 142, 242–257. 10.1242/dev.105445.
- 1114 7. Trainor, P.A., and Tam, P.P. (1995). Cranial paraxial mesoderm and neural crest cells  
1115 of the mouse embryo: co-distribution in the craniofacial mesenchyme but distinct  
1116 segregation in branchial arches. *Development* 121, 2569–2582.  
1117 10.1242/dev.121.8.2569.
- 1118 8. Innocenti, M. (2018). New insights into the formation and the function of lamellipodia  
1119 and ruffles in mesenchymal cell migration. *Cell Adhes. Migr.* 12, 401–416.  
1120 10.1080/19336918.2018.1448352.
- 1121 9. Insall, R.H., and Machesky, L.M. (2009). Actin Dynamics at the Leading Edge: From  
1122 Simple Machinery to Complex Networks. *Dev. Cell* 17, 310–322.  
1123 10.1016/j.devcel.2009.08.012.
- 1124 10. Krause, M., and Gautreau, A. (2014). Steering cell migration: Lamellipodium  
1125 dynamics and the regulation of directional persistence. *Nat. Rev. Mol. Cell Biol.* 15,  
1126 577–590. 10.1038/nrm3861.
- 1127 11. Mattila, P.K., and Lappalainen, P. (2008). Filopodia: Molecular architecture and  
1128 cellular functions. *Nat. Rev. Mol. Cell Biol.* 9, 446–454. 10.1038/nrm2406.
- 1129 12. SenGupta, S., Parent, C.A., and Bear, J.E. (2021). The principles of directed cell  
1130 migration. *Nat. Rev. Mol. Cell Biol.* 22, 529–547. 10.1038/s41580-021-00366-6.
- 1131 13. Gonzalez Malagon, S.G., Lopez Muñoz, A.M., Doro, D., Bolger, T.G., Poon, E.,  
1132 Tucker, E.R., Adel Al-Lami, H., Krause, M., Phiel, C.J., Chesler, L., et al. (2018).  
1133 Glycogen synthase kinase 3 controls migration of the neural crest lineage in mouse  
1134 and *Xenopus*. *Nat. Commun.* 9. 10.1038/s41467-018-03512-5.
- 1135 14. Richardson, J., Gauert, A., Briones Montecinos, L., Fanlo, L., Alhashem, Z.M., Assar,  
1136 R., Marti, E., Kabla, A., Härtel, S., and Linker, C. (2016). Leader Cells Define  
1137 Directionality of Trunk, but Not Cranial, Neural Crest Cell Migration. *Cell Rep.* 15,

- 1138 2076–2088. [10.1016/j.celrep.2016.04.067](https://doi.org/10.1016/j.celrep.2016.04.067).
- 1139 15. Krause, M., Leslie, J.D., Stewart, M., Lafuente, E.M., Valderrama, F., Jagannathan,  
1140 R., Strasser, G.A., Rubinson, D.A., Liu, H., Way, M., et al. (2004). Lamellipodin, an  
1141 Ena/VASP ligand, is implicated in the regulation of lamellipodial Dynamics. *Dev. Cell*  
1142 7, 571–583. [10.1016/j.devcel.2004.07.024](https://doi.org/10.1016/j.devcel.2004.07.024).
- 1143 16. Law, A.L., Vehlow, A., Kotini, M., Dodgson, L., Soong, D., Theveneau, E., Bodo, C.,  
1144 Taylor, E., Navarro, C., Perera, U., et al. (2013). Lamellipodin and the Scar/WAVE  
1145 complex cooperate to promote cell migration in vivo. *J. Cell Biol.* 203, 673–689.  
1146 [10.1083/jcb.201304051](https://doi.org/10.1083/jcb.201304051).
- 1147 17. Carmona, G., Perera, U., Gillett, C., Naba, A., Law, A.L., Sharma, V.P., Wang, J.,  
1148 Wyckoff, J., Balsamo, M., Mosis, F., et al. (2016). Lamellipodin promotes invasive 3D  
1149 cancer cell migration via regulated interactions with Ena/VASP and SCAR/WAVE.  
1150 *Oncogene* 35, 5155–5169. [10.1038/onc.2016.47](https://doi.org/10.1038/onc.2016.47).
- 1151 18. Machesky, L.M., Mullins, R.D., Higgs, H.N., Kaiser, D.A., Blanchoin, L., May, R.C.,  
1152 Hall, M.E., and Pollard, T.D. (1999). Scar, a WASp-related protein, activates  
1153 nucleation of actin filaments by the Arp2/3 complex. *Proc. Natl. Acad. Sci. U. S. A.* 96,  
1154 3739–3744. [10.1073/pnas.96.7.3739](https://doi.org/10.1073/pnas.96.7.3739).
- 1155 19. Marchand, J.B., Kaiser, D.A., Pollard, T.D., and Higgs, H.N. (2001). Interaction of  
1156 WASP/Scar proteins with actin and vertebrate Arp2/3 complex. *Nat. Cell Biol.* 3, 76–  
1157 82. [10.1038/35050590](https://doi.org/10.1038/35050590).
- 1158 20. Barzik, M., Kotova, T.I., Higgs, H.N., Hazelwood, L., Hanein, D., Gertler, F.B., and  
1159 Schafer, D.A. (2005). Ena/VASP proteins enhance actin polymerization in the  
1160 presence of barbed end capping proteins. *J. Biol. Chem.* 280, 28653–28662.  
1161 [10.1074/jbc.M503957200](https://doi.org/10.1074/jbc.M503957200).
- 1162 21. Bear, J.E., Svitkina, T.M., Krause, M., Schafer, D.A., Loureiro, J.J., Strasser, G.A.,  
1163 Maly, I. V., Chaga, O.Y., Cooper, J.A., Borisy, G.G., et al. (2002). Antagonism  
1164 between Ena/VASP proteins and actin filament capping regulates fibroblast motility.  
1165 *Cell* 109, 509–521. [10.1016/S0092-8674\(02\)00731-6](https://doi.org/10.1016/S0092-8674(02)00731-6).

- 1166 22. Breitsprecher, D., Kieseewetter, A.K., Linkner, J., Vinzenz, M., Stradal, T.E.B., Small,  
1167 J.V., Curth, U., Dickinson, R.B., and Faix, J. (2011). Molecular mechanism of  
1168 Ena/VASP-mediated actin-filament elongation. *EMBO J.* 30, 456–467.  
1169 10.1038/emboj.2010.348.
- 1170 23. Breitsprecher, D., Kieseewetter, A.K., Linkner, J., Urbanke, C., Resch, G.P., Small,  
1171 J.V., and Faix, J. (2008). Clustering of VASP actively drives processive, WH2 domain-  
1172 mediated actin filament elongation. *EMBO J.* 27, 2943–2954.  
1173 10.1038/emboj.2008.211.
- 1174 24. Brühmann, S., Ushakov, D.S., Winterhoff, M., Dickinson, R.B., Curth, U., and Faix, J.  
1175 (2017). Distinct VASP tetramers synergize in the processive elongation of individual  
1176 actin filaments from clustered arrays. *Proc. Natl. Acad. Sci. U. S. A.* 114, E5815–  
1177 E5824. 10.1073/pnas.1703145114.
- 1178 25. Faix, J., and Rottner, K. (2022). Ena/VASP proteins in cell edge protrusion, migration  
1179 and adhesion. *J. Cell Sci.* 135. 10.1242/jcs.259226.
- 1180 26. Ferron, F., Rebowski, G., Lee, S.H., and Dominguez, R. (2007). Structural basis for  
1181 the recruitment of profilin-actin complexes during filament elongation by Ena/VASP.  
1182 *EMBO J.* 26, 4597–4606. 10.1038/sj.emboj.7601874.
- 1183 27. Krause, M., Dent, E.W., Bear, J.E., Loureiro, J.J., and Gertler, F.B. (2003). Ena/VASP  
1184 Proteins: Regulators of the Actin Cytoskeleton and Cell Migration. *Annu. Rev. Cell*  
1185 *Dev. Biol.* 19, 541–564. 10.1146/annurev.cellbio.19.050103.103356.
- 1186 28. Damiano-Guercio, J., Kurzawa, L., Mueller, J., Dimchev, G., Schaks, M., Nemethova,  
1187 M., Pokrant, T., Brühmann, S., Linkner, J., Blanchoin, L., et al. (2020). Loss of  
1188 ENA/VASP interferes with lamellipodium architecture, motility and integrin-dependent  
1189 adhesion. *Elife* 9, 1–31. 10.7554/eLife.55351.
- 1190 29. Wu, C., Asokan, S.B., Berginski, M.E., Haynes, E.M., Sharpless, N.E., Griffith, J.D.,  
1191 Gomez, S.M., and Bear, J.E. (2012). Arp2/3 is critical for lamellipodia and response to  
1192 extracellular matrix cues but is dispensable for chemotaxis. *Cell* 148, 973–987.  
1193 10.1016/j.cell.2011.12.034.

- 1194 30. Muzumdar, M.D., Tasic, B., Miyamichi, K., Li, L., and Luo, L. (2007). A Global Double-  
1195 Fluorescent Cre Reporter Mouse. *Genesis* 45, 595–605. 10.1002/dvg.
- 1196 31. Schachtner, H., Li, A., Stevenson, D., Calaminus, S.D.J., Thomas, S.G., Watson,  
1197 S.P., Sixt, M., Wedlich-Soldner, R., Strathdee, D., and Machesky, L.M. (2012). Tissue  
1198 inducible Lifeact expression allows visualization of actin dynamics in vivo and ex vivo.  
1199 *Eur. J. Cell Biol.* 91, 923–929. 10.1016/j.ejcb.2012.04.002.
- 1200 32. Danielian, P.S., Muccino, D., Rowitch, D.H., Michael, S.K., and McMahon, A.P.  
1201 (1998). Modification of gene activity in mouse embryos in utero by a tamoxifen-  
1202 inducible form of Cre recombinase. *Curr. Biol.* 8, 1323–1326. 10.1016/s0960-  
1203 9822(07)00562-3.
- 1204 33. Gonzalez-Malagon, S.G., Dobson, L., Muñoz, A.M.L., Dawson, M., Barrell, W.,  
1205 Marangos, P., Krause, M., and Liu, K.J. (2019). Dissection, culture and analysis of  
1206 primary cranial neural crest cells from mouse for the study of neural crest cell  
1207 delamination and migration. *J. Vis. Exp.* 2019, 1–9. 10.3791/60051.
- 1208 34. Gorelik, R., and Gautreau, A. (2014). Quantitative and unbiased analysis of directional  
1209 persistence in cell migration. *Nat. Protoc.* 9, 1931–1943. 10.1038/nprot.2014.131.
- 1210 35. Stradal, T., Courtney, K.D., Rottner, K., Hahne, P., Small, J.V., and Pendergast, A.M.  
1211 (2001). The Abl interactor proteins localize to sites of actin polymerization at the tips  
1212 of lamellipodia and filopodia. *Curr. Biol.* 11, 891–895. 10.1016/S0960-9822(01)00239-  
1213 1.
- 1214 36. Law, A.L., Vehlow, A., Kotini, M., Dodgson, L., Soong, D., Theveneau, E., Bodo, C.,  
1215 Taylor, E., Navarro, C., Perera, U., et al. (2013). Lamellipodin and the Scar/WAVE  
1216 complex cooperate to promote cell migration in vivo. *J. Cell Biol.* 203, 673–689.  
1217 10.1083/jcb.201304051.
- 1218 37. Lanier, L.M., Gates, M.A., Witke, W., Menzies, A.S., Wehman, A.M., Macklis, J.D.,  
1219 Kwiatkowski, D., Soriano, P., and Gertler, F.B. (1999). Mena is required for  
1220 neurulation and commissure formation. *Neuron* 22, 313–325. 10.1016/S0896-  
1221 6273(00)81092-2.

- 1222 38. Menzies, A.S., Aszodi, A., Williams, S.E., Pfeifer, A., Wehman, A.M., Goh, K.L.,  
1223 Mason, C.A., Fassler, R., and Gertler, F.B. (2004). Mena and vasodilator-stimulated  
1224 phosphoprotein are required for multiple actin-dependent processes that shape the  
1225 vertebrate nervous system. *J. Neurosci.* 24, 8029–8038. 10.1523/JNEUROSCI.1057-  
1226 04.2004.
- 1227 39. Etienne-Manneville, S. (2013). Microtubules in cell migration. *Annu. Rev. Cell Dev.*  
1228 *Biol.* 29, 471–499. 10.1146/annurev-cellbio-101011-155711.
- 1229 40. De Pascalis, C., and Etienne-Manneville, S. (2017). Single and collective cell  
1230 migration: The mechanics of adhesions. *Mol. Biol. Cell* 28, 1833–1846.  
1231 10.1091/mbc.E17-03-0134.
- 1232 41. Parsons, J.T., Horwitz, A.R., and Schwartz, M.A. (2010). Cell adhesion: Integrating  
1233 cytoskeletal dynamics and cellular tension. *Nat. Rev. Mol. Cell Biol.* 11, 633–643.  
1234 10.1038/nrm2957.
- 1235 42. Gertler, F.B., Niebuhr, K., Reinhard, M., Wehland, J., and Soriano, P. (1996). Mena, a  
1236 relative of VASP and *Drosophila* enabled, is implicated in the control of microfilament  
1237 dynamics. *Cell* 87, 227–239. 10.1016/S0092-8674(00)81341-0.
- 1238 43. Lafuente, E.M., van Puijenbroek, A.A.F.L., Krause, M., Carman, C. V., Freeman, G.J.,  
1239 Berezovskaya, A., Constantine, E., Springer, T.A., Gertler, F.B., and Boussiotis, V.A.  
1240 (2004). RIAM, an Ena/VASP and profilin ligand, interacts with Rap1-GTP and  
1241 mediates Rap1-induced adhesion. *Dev. Cell* 7, 585–595.  
1242 10.1016/j.devcel.2004.07.021.
- 1243 44. Brindle, N.P.J., Holt, M.R., Davies, J.E., Price, C.J., and Critchley, D.R. (1996). The  
1244 focal-adhesion vasodilator-stimulated phosphoprotein (VASP) binds to the proline-rich  
1245 domain in vinculin. *757*, 753–757.
- 1246 45. Gupton, S.L., Riquelme, D., Hughes-Alford, S.K., Tadros, J., Rudina, S.S., Hynes,  
1247 R.O., Lauffenburger, D., and Gertler, F.B. (2012). Mena binds  $\alpha 5$  integrin directly and  
1248 modulates  $\alpha 5\beta 1$  function. *J. Cell Biol.* 198, 657–676. 10.1083/jcb.201202079.
- 1249 46. Kang, N., Yaqoob, U., Geng, Z., Bloch, K., Liu, C., Gomez, T., Billadeau, D., and

- 1250 Shah, V. (2010). Focal adhesion assembly in myofibroblasts fosters a  
1251 microenvironment that promotes tumor growth. *Am. J. Pathol.* *177*, 1888–1900.  
1252 10.2353/ajpath.2010.100187.
- 1253 47. Puleo, J.I., Parker, S.S., Roman, M.R., Watson, A.W., Eliato, K.R., Peng, L., Saboda,  
1254 K., Roe, D.J., Ros, R., Gertler, F.B., et al. (2019). Mechanosensing during directed  
1255 cell migration requires dynamic actin polymerization at focal adhesions. *J. Cell Biol.*  
1256 *218*, 4215–4235. 10.1083/JCB.201902101.
- 1257 48. Reinhard, M., Giehl, K., Abel, K., Haffner, C., Jarchau, T., Hoppe, V., Jockusch, B.M.,  
1258 and Walter, U. (1995). The proline-rich focal adhesion and microfilament protein  
1259 VASP is a ligand for profilins. *EMBO J.* *14*, 1583–1589. 10.1002/j.1460-  
1260 2075.1995.tb07146.x.
- 1261 49. Han, Y.H., Chung, C.Y., Wessels, D., Stephens, S., Titus, M.A., Soll, D.R., and Firtel,  
1262 R.A. (2002). Requirement of a vasodilator-stimulated phosphoprotein family member  
1263 for cell adhesion, the formation of filopodia, and chemotaxis in *Dictyostelium*. *J. Biol.*  
1264 *Chem.* *277*, 49877–49887. 10.1074/jbc.M209107200.
- 1265 50. Lee, H.S., Lim, C.J., Puzon-McLaughlin, W., Shattil, S.J., and Ginsberg, M.H. (2009).  
1266 RIAM activates integrins by linking talin to Ras GTPase membrane-targeting  
1267 sequences. *J. Biol. Chem.* *284*, 5119–5122. 10.1074/jbc.M807117200.
- 1268 51. Lee, H.S., Anekal, P., Lim, C.J., Liu, C.C., and Ginsberg, M.H. (2013). Two modes of  
1269 integrin activation form a binary molecular switch in adhesion maturation. *Mol. Biol.*  
1270 *Cell* *24*, 1354–1362. 10.1091/mbc.E12-09-0695.
- 1271 52. Vigouroux, C., Henriot, V., and Le Clainche, C. (2020). Talin dissociates from RIAM  
1272 and associates to vinculin sequentially in response to the actomyosin force. *Nat.*  
1273 *Commun.* *11*, 3116. 10.1038/s41467-020-16922-1.
- 1274 53. Soldatov, R., Kaucka, M., Kastriti, M.E., Petersen, J., Chontorotzea, T., Englmaier, L.,  
1275 Akkuratova, N., Yang, Y., Häring, M., Dyachuk, V., et al. (2019). Spatiotemporal  
1276 structure of cell fate decisions in murine neural crest. *Science* (80-. ). *364*.  
1277 10.1126/science.aas9536.



- 1278 54. Bachir, A.I., Zareno, J., Moissoglu, K., Plow, E.F., Gratton, E., and Horwitz, A.R.  
1279 (2014). Integrin-associated complexes form hierarchically with variable stoichiometry  
1280 in nascent adhesions. *Curr. Biol.* 24, 1845–1853. 10.1016/j.cub.2014.07.011.
- 1281 55. Bachir, A.I., Horwitz, A.R., Nelson, W.J., and Bianchini, J.M. (2017). Actin-based  
1282 adhesion modules mediate cell interactions with the extracellular matrix and  
1283 neighboring cells. *Cold Spring Harb. Perspect. Biol.* 9. 10.1101/cshperspect.a023234.
- 1284 56. Lagarrigue, F., Anekal, P.V., Lee, H., Bachir, A.I., Ablack, J.N., Horwitz, A.F., and  
1285 Ginsberg, M.H. (2015). A RIAM/lamellipodin–talin–integrin complex forms the tip of  
1286 sticky fingers that guide cell migration. 10.1038/ncomms9492.
- 1287 57. Zaidel-Bar, R., Ballestrem, C., Kam, Z., and Geiger, B. (2003). Early molecular events  
1288 in the assembly of matrix adhesions at the leading edge of migrating cells. *J. Cell Sci.*  
1289 116, 4605–4613. 10.1242/jcs.00792.
- 1290 58. Boer, E.F., Howell, E.D., Schilling, T.F., Jette, C.A., and Stewart, R.A. (2015).  
1291 Fascin1-Dependent Filopodia are Required for Directional Migration of a Subset of  
1292 Neural Crest Cells. *PLoS Genet.* 11, 1–25. 10.1371/journal.pgen.1004946.
- 1293 59. Carmona-Fontaine, C., Matthews, H.K., Kuriyama, S., Moreno, M., Dunn, G.A.,  
1294 Parsons, M., Stern, C.D., and Mayor, R. (2008). Contact inhibition of locomotion in  
1295 vivo controls neural crest directional migration. *Nature* 456, 957–961.  
1296 10.1038/nature07441.
- 1297 60. Li, Y., Vieceli, F.M., Gonzalez, W.G., Li, A., Tang, W., Lois, C., and Bronner, M.E.  
1298 (2019). In Vivo Quantitative Imaging Provides Insights into Trunk Neural Crest  
1299 Migration. *Cell Rep.* 26, 1489-1500.e3. 10.1016/j.celrep.2019.01.039.
- 1300 61. Teddy, J.M. (2004). In vivo evidence for short- and long-range cell communication in  
1301 cranial neural crest cells. *Development* 131, 6141–6151. 10.1242/dev.01534.
- 1302 62. Friedl, P., and Alexander, S. (2011). Cancer invasion and the microenvironment:  
1303 Plasticity and reciprocity. *Cell* 147, 992–1009. 10.1016/j.cell.2011.11.016.
- 1304 63. Friedl, P., and Wolf, K. (2010). Plasticity of cell migration: A multiscale tuning model.  
1305 *J. Cell Biol.* 188, 11–19. 10.1083/jcb.200909003.

- 1306 64. Genuth, M.A., Allen, C.D.C., Mikawa, T., and Weiner, O.D. (2018). Chick cranial  
1307 neural crest cells use progressive polarity refinement, not contact inhibition of  
1308 locomotion, to guide their migration. *Dev. Biol.* *444*, S252–S261.  
1309 [10.1016/j.ydbio.2018.02.016](https://doi.org/10.1016/j.ydbio.2018.02.016).
- 1310 65. Petrie, R.J., and Yamada, K.M. (2012). At the leading edge of three-dimensional cell  
1311 migration. *J. Cell Sci.* *125*, 5917–5926. [10.1242/jcs.093732](https://doi.org/10.1242/jcs.093732).
- 1312 66. Omelchenko, T., Hall, A., and Anderson, K. V. (2020).  $\beta$ -Pix-dependent cellular  
1313 protrusions propel collective mesoderm migration in the mouse embryo. *Nat.*  
1314 *Commun.* *11*. [10.1038/s41467-020-19889-1](https://doi.org/10.1038/s41467-020-19889-1).
- 1315 67. Bischoff, M.C., Lieb, S., Renkawitz-Pohl, R., and Bogdan, S. (2021). Filopodia-based  
1316 contact stimulation of cell migration drives tissue morphogenesis. *Nat. Commun.* *12*,  
1317 1–18. [10.1038/s41467-020-20362-2](https://doi.org/10.1038/s41467-020-20362-2).
- 1318 68. Dimchev, G., Amiri, B., Humphries, A.C., Schaks, M., Dimchev, V., Stradal, T.E.B.,  
1319 Faix, J., Krause, M., Way, M., Falcke, M., et al. (2020). Lamellipodin tunes cell  
1320 migration by stabilizing protrusions and promoting adhesion formation. *J. Cell Sci.*,  
1321 *jcs.239020*. [10.1242/jcs.239020](https://doi.org/10.1242/jcs.239020).
- 1322 69. Papalazarou, V., Swaminathan, K., Jaber-Hijazi, F., Spence, H., Lahmann, I., Nixon,  
1323 C., Salmeron-Sanchez, M., Arnold, H.H., Rottner, K., and Machesky, L.M. (2020). The  
1324 Arp2/3 complex is crucial for colonisation of the mouse skin by melanoblasts. *Dev.*  
1325 *147*. [10.1242/dev.194555](https://doi.org/10.1242/dev.194555).
- 1326 70. Woodgett, J.R. (2013). Energy Metabolism | Glycogen Synthase Kinase-3. In  
1327 *Encyclopedia of Biological Chemistry III* (Elsevier), pp. 207–212. [10.1016/B978-0-12-](https://doi.org/10.1016/B978-0-12-819460-7.00574-0)  
1328 [819460-7.00574-0](https://doi.org/10.1016/B978-0-12-819460-7.00574-0).
- 1329 71. Doble, B.W., and Woodgett, J.R. (2003). GSK-3: Tricks of the trade for a multi-tasking  
1330 kinase. *J. Cell Sci.* *116*, 1175–1186. [10.1242/jcs.00384](https://doi.org/10.1242/jcs.00384).
- 1331 72. Frame, S., and Cohen, P. (2001). GSK3 takes centre stage more than 20 years after  
1332 its discovery. *Biochem. J.* *359*, 1–16. [10.1042/0264-6021:3590001](https://doi.org/10.1042/0264-6021:3590001).
- 1333 73. Etienne-Manneville, S., and Hall, A. (2003). Cdc42 regulates GSK-3 $\beta$  and

- 1334 adenomatous polyposis coli to control cell polarity. *Nature* *421*, 753–756.  
1335 [10.1038/nature01423](https://doi.org/10.1038/nature01423).
- 1336 74. Etienne-Manneville, S., and Hall, A. (2001). Integrin-mediated activation of Cdc42  
1337 controls cell polarity in migrating astrocytes through PKC $\zeta$ . *Cell* *106*, 489–498.  
1338 [10.1016/S0092-8674\(01\)00471-8](https://doi.org/10.1016/S0092-8674(01)00471-8).
- 1339 75. Trivedi, N., Marsh, P., Goold, R.G., Wood-Kaczmar, A., and Gordon-Weeks, P.R.  
1340 (2005). Glycogen synthase kinase-3 $\beta$  phosphorylation of MAP1B at Ser1260 and  
1341 Thr1265 is spatially restricted to growing axons. *J. Cell Sci.* *118*, 993–1005.  
1342 [10.1242/jcs.01697](https://doi.org/10.1242/jcs.01697).
- 1343 76. Goold, R.G., Owen, R., and Gordon-Weeks, P.R. (1999). Glycogen synthase kinase  
1344 3 $\beta$  phosphorylation of microtubule-associated protein 1B regulates the stability of  
1345 microtubules in growth cones. *J. Cell Sci.* *112*, 3373–3384. [10.1242/jcs.112.19.3373](https://doi.org/10.1242/jcs.112.19.3373).
- 1346 77. Gordon-Weeks, P.R., and Fischer, I. (2000). MAP1 B expression and microtubule  
1347 stability in growing and regenerating axons. *Microsc. Res. Tech.* *48*, 63–74.  
1348 [10.1002/\(SICI\)1097-0029\(20000115\)48:2<63::AID-JEMT2>3.0.CO;2-1](https://doi.org/10.1002/(SICI)1097-0029(20000115)48:2<63::AID-JEMT2>3.0.CO;2-1).
- 1349 78. Bianchi, M., De Lucchini, S., Marin, O., Turner, D.L., Hanks, S.K., and Villa-Moruzzi,  
1350 E. (2005). Regulation of FAK Ser-722 phosphorylation and kinase activity by GSK3  
1351 and PP1 during cell spreading and migration. *Biochem. J.* *391*, 359–370.  
1352 [10.1042/BJ20050282](https://doi.org/10.1042/BJ20050282).
- 1353 79. Kobayashi, T., Hino, S., Oue, N., Asahara, T., Zollo, M., Yasui, W., and Kikuchi, A.  
1354 (2006). Glycogen Synthase Kinase 3 and h-prune Regulate Cell Migration by  
1355 Modulating Focal Adhesions. *Mol. Cell. Biol.* *26*, 898–911. [10.1128/mcb.26.3.898-  
1356 911.2006](https://doi.org/10.1128/mcb.26.3.898-911.2006).
- 1357 80. Michael, M., Vehlow, A., Navarro, C., and Krause, M. (2010). c-Abl, Lamellipodin, and  
1358 Ena/VASP Proteins Cooperate in Dorsal Ruffling of Fibroblasts and Axonal  
1359 Morphogenesis. *Curr. Biol.* *20*, 783–791. [10.1016/j.cub.2010.03.048](https://doi.org/10.1016/j.cub.2010.03.048).
- 1360 81. Kölsch, V., Shen, Z., Lee, S., Plak, K., Lotfi, P., Chang, J., Charest, P.G., Romero,  
1361 J.L., Jeon, T.J., Kortholt, A., et al. (2013). Daydreamer, a Ras effector and GSK-3

- 1362 substrate, is important for directional sensing and cell motility. *Mol. Biol. Cell* **24**, 100–  
1363 114. 10.1091/mbc.E12-04-0271.
- 1364 82. Niebuhr, K., Ebel, F., Frank, R., Reinhard, M., Domann, E., Carl, U.D., Walter, U.,  
1365 Gertler, F.B., Wehland, J., and Chakraborty, T. (1997). A novel proline-rich motif  
1366 present in ActA of *Listeria monocytogenes* and cytoskeletal proteins is the ligand for  
1367 the EVH1 domain, a protein module present in the Ena/VASP family. *EMBO J.* **16**,  
1368 5433–5444. 10.1093/emboj/16.17.5433.
- 1369 83. Hoffman, L.M., Jensen, C.C., Kloeker, S., Wang, C.L.A., Yoshigi, M., and Beckerle,  
1370 M.C. (2006). Genetic ablation of zyxin causes Mena/VASP mislocalization, increased  
1371 motility, and deficits in actin remodeling. *J. Cell Biol.* **172**, 771–782.  
1372 10.1083/jcb.200512115.
- 1373 84. Legerstee, K., Geverts, B., Slotman, J.A., and Houtsmuller, A.B. (2019). Dynamics  
1374 and distribution of paxillin, vinculin, zyxin and VASP depend on focal adhesion  
1375 location and orientation. *Sci. Rep.* **9**, 1–18. 10.1038/s41598-019-46905-2.
- 1376 85. Rottner, K., Krause, M., Gimona, M., Small, J. V., and Wehland, J. (2001). Zyxin is not  
1377 colocalized with vasodilator-stimulated phosphoprotein (VASP) at lamellipodial tips  
1378 and exhibits different dynamics to vinculin, paxillin, and VASP in focal adhesions. *Mol.*  
1379 *Biol. Cell* **12**, 3103–3113. 10.1091/mbc.12.10.3103.
- 1380 86. Cheng, K.W., and Mullins, R.D. (2020). Initiation and disassembly of filopodia tip  
1381 complexes containing VASP and lamellipodin. *Mol. Biol. Cell* **31**, 2021–2034.  
1382 10.1091/mbc.E20-04-0270.
- 1383 87. Silva, J.M., Ezhkova, E., Silva, J., Heart, S., Castillo, M., Campos, Y., Castro, V.,  
1384 Bonilla, F., Cordon-Cardo, C., Muthuswamy, S.K., et al. (2009). Cyfip1 Is a Putative  
1385 Invasion Suppressor in Epithelial Cancers. *Cell* **137**, 1047–1061.  
1386 10.1016/j.cell.2009.04.013.
- 1387 88. Thomas, P.S., Kim, J., Nunez, S., Glogauer, M., and Kaartinen, V. (2010). Neural  
1388 crest cell-specific deletion of Rac1 results in defective cell–matrix interactions and  
1389 severe craniofacial and cardiovascular malformations. *Dev. Biol.* **340**, 613–625.

- 1390 10.1016/j.ydbio.2010.02.021.
- 1391 89. Whitelaw, J.A., Swaminathan, K., Kage, F., and Machesky, L.M. (2020). The WAVE  
1392 Regulatory Complex Is Required to Balance Protrusion and Adhesion in Migration.  
1393 *Cells* 9, 1635. 10.3390/cells9071635.
- 1394 90. Ridley, A.J., Schwartz, M.A., Burridge, K., Firtel, R.A., Ginsberg, M.H., Borisy, G.,  
1395 Parsons, J.T., and Horwitz, A.R. (2003). Cell Migration: Integrating Signals from Front  
1396 to Back. *Science* (80-. ). 302, 1704–1709. 10.1126/science.1092053.
- 1397 91. SenGupta, S., Parent, C.A., and Bear, J.E. (2021). The principles of directed cell  
1398 migration. *Nat. Rev. Mol. Cell Biol.* 0123456789. 10.1038/s41580-021-00366-6.
- 1399 92. Liu, Y., Jin, Y., Li, J., Seto, E., Kuo, E., Yu, W., Schwartz, R.J., Blazo, M., Zhang, S.L.,  
1400 and Peng, X. (2013). Inactivation of Cdc42 in neural crest cells causes craniofacial  
1401 and cardiovascular morphogenesis defects. *Dev. Biol.* 383, 239–252.  
1402 10.1016/j.ydbio.2013.09.013.
- 1403 93. Vallejo-Illarramendi, A., Zang, K., and Reichardt, L.F. (2009). Focal adhesion kinase  
1404 is required for neural crest cell morphogenesis during mouse cardiovascular  
1405 development. *J. Clin. Invest.* 119, 2218–2230. 10.1172/JCI38194.
- 1406 94. Hari, L., Brault, V., Kléber, M., Lee, H.Y., Ille, F., Leimeroth, R., Paratore, C., Suter,  
1407 U., Kemler, R., and Sommer, L. (2002). Lineage-specific requirements of  $\beta$ -catenin in  
1408 neural crest development. *J. Cell Biol.* 159, 867–880. 10.1083/jcb.200209039.
- 1409 95. Rabadán, M.A., Herrera, A., Fanlo, L., Usieto, S., Carmona-Fontaine, C., Barriga,  
1410 E.H., Mayor, R., Pons, S., and Martí, E. (2016). Delamination of neural crest cells  
1411 requires transient and reversible Wnt inhibition mediated by Dact1/2. *Dev.* 143, 2194–  
1412 2205. 10.1242/dev.134981.
- 1413 96. Farooqui, R., Zhu, S., and Fenteany, G. (2006). Glycogen synthase kinase-3 acts  
1414 upstream of ADP-ribosylation factor 6 and Rac1 to regulate epithelial cell migration.  
1415 *Exp. Cell Res.* 312, 1514–1525. 10.1016/j.yexcr.2006.01.018.
- 1416 97. Jiang, W., Betson, M., Mulloy, R., Foster, R., Lévy, M., Ligeti, E., and Settleman, J.  
1417 (2008). P190A RhoGAP is a glycogen synthase kinase-3- $\beta$  substrate required for

- 1418 polarized cell migration. *J. Biol. Chem.* 283, 20978–20988. 10.1074/jbc.M802588200.
- 1419 98. Niebuhr, K., Lingnau, A., Frank, R. and Wehland, J. (1998). Rapid procedures for  
1420 preparing monoclonal antibodies and identifying their epitopes. *Cell Biol. A Lab.*  
1421 *Handb.* 2, pp.398-403.
- 1422 99. Dunn, G.A., and Brown, A.F. (1987). A unified approach to analysing cell motility. *J.*  
1423 *Cell Sci.* 102, 81–102. 10.1242/jcs.1987.supplement\_8.5.
- 1424

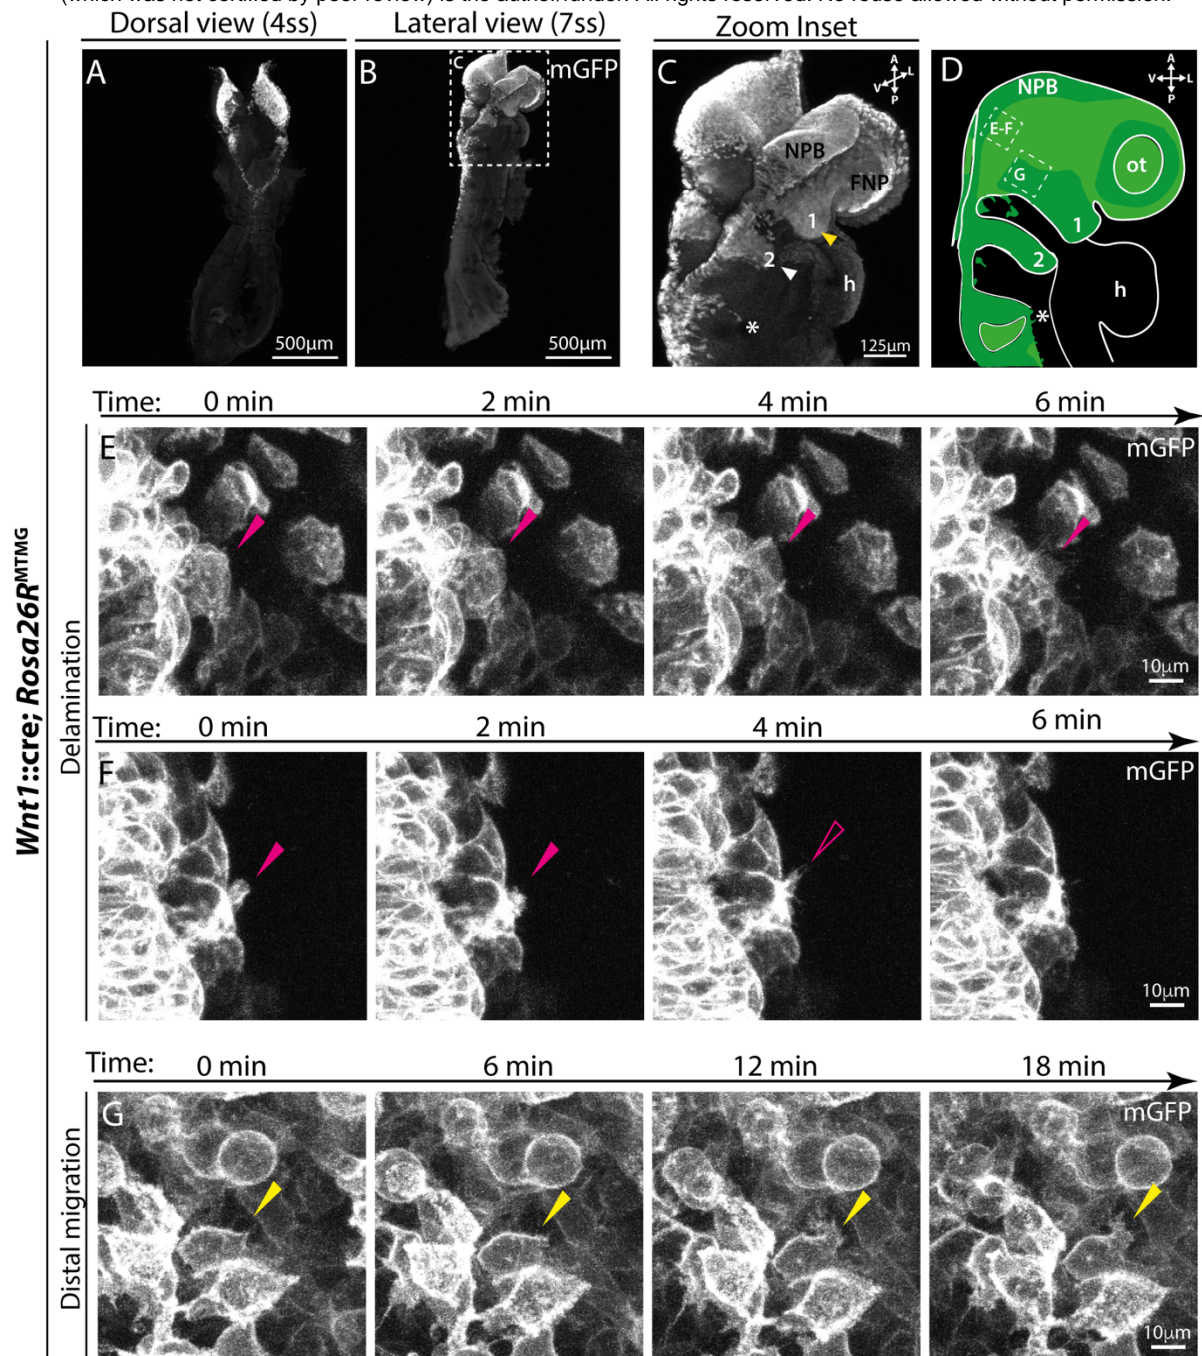

**Figure 1. Mouse cranial neural crest cells display lamellipodia and filopodia *in vivo*.**

(A-B) Maximum projection images of E8.5-8.75 mouse embryos, with the neural crest lineage-labelled with mGFP (*Wnt1::cre; Rosa26R<sup>mtmg</sup>*), shown as (A) dorsal view (4 somite stage, ss) and (B) lateral view (7ss). Scale bar: 500  $\mu$ m. (C) Zoom inset of (B) showing the cranial neural crest streams of an E8.75 embryo (7ss). Cranial neural crest cells leave the neural plate border (NPB) and migrate to populate the frontal nasal process (FNP), pharyngeal arch 1 (PA1, yellow arrowhead) and pharyngeal arch 2 (PA2, white arrowhead). Vagal and cardiac neural

crest streams also start to emerge (\*). Scale bar: 125  $\mu\text{m}$ . **(D)** Schematic representation of a laterally-oriented E8.75 embryo (7-9ss), with white dashed boxes showing the imaging regions of interest (ROIs) in **(E-G)**. Green: lineage-labelled neural crest streams. h: heart, ot: otic vesicle. **(E-G)** Time-lapse stills from live imaging of laterally-oriented wild-type (*Wnt1::cre; Rosa26R<sup>mtmg</sup>*) E8.75 embryos, with neural crest cells labelled with mGFP. **(E-F)** Time-lapse stills from two example movies of delaminating cranial neural crest (solid magenta arrowhead: lamellipodia and open magenta arrowhead: filopodia). 10 minute movies (1 frame/ 20 seconds), z-depth 24.5  $\mu\text{m}$ , 0.5  $\mu\text{m}$  per slice. See **Supplementary Movies 1-2**. **(G)** Filopodial protrusions on distally migrating cranial neural crest cells (yellow arrowhead). 30 minute movie (1 frame/ 45 seconds), z-depth 40  $\mu\text{m}$ , 0.5  $\mu\text{m}$  per slice, see **Supplementary Movie 3**. Movies are representative of 3 embryos, all 6-10 somite stage (n=3). Scale bar: 10  $\mu\text{m}$ .



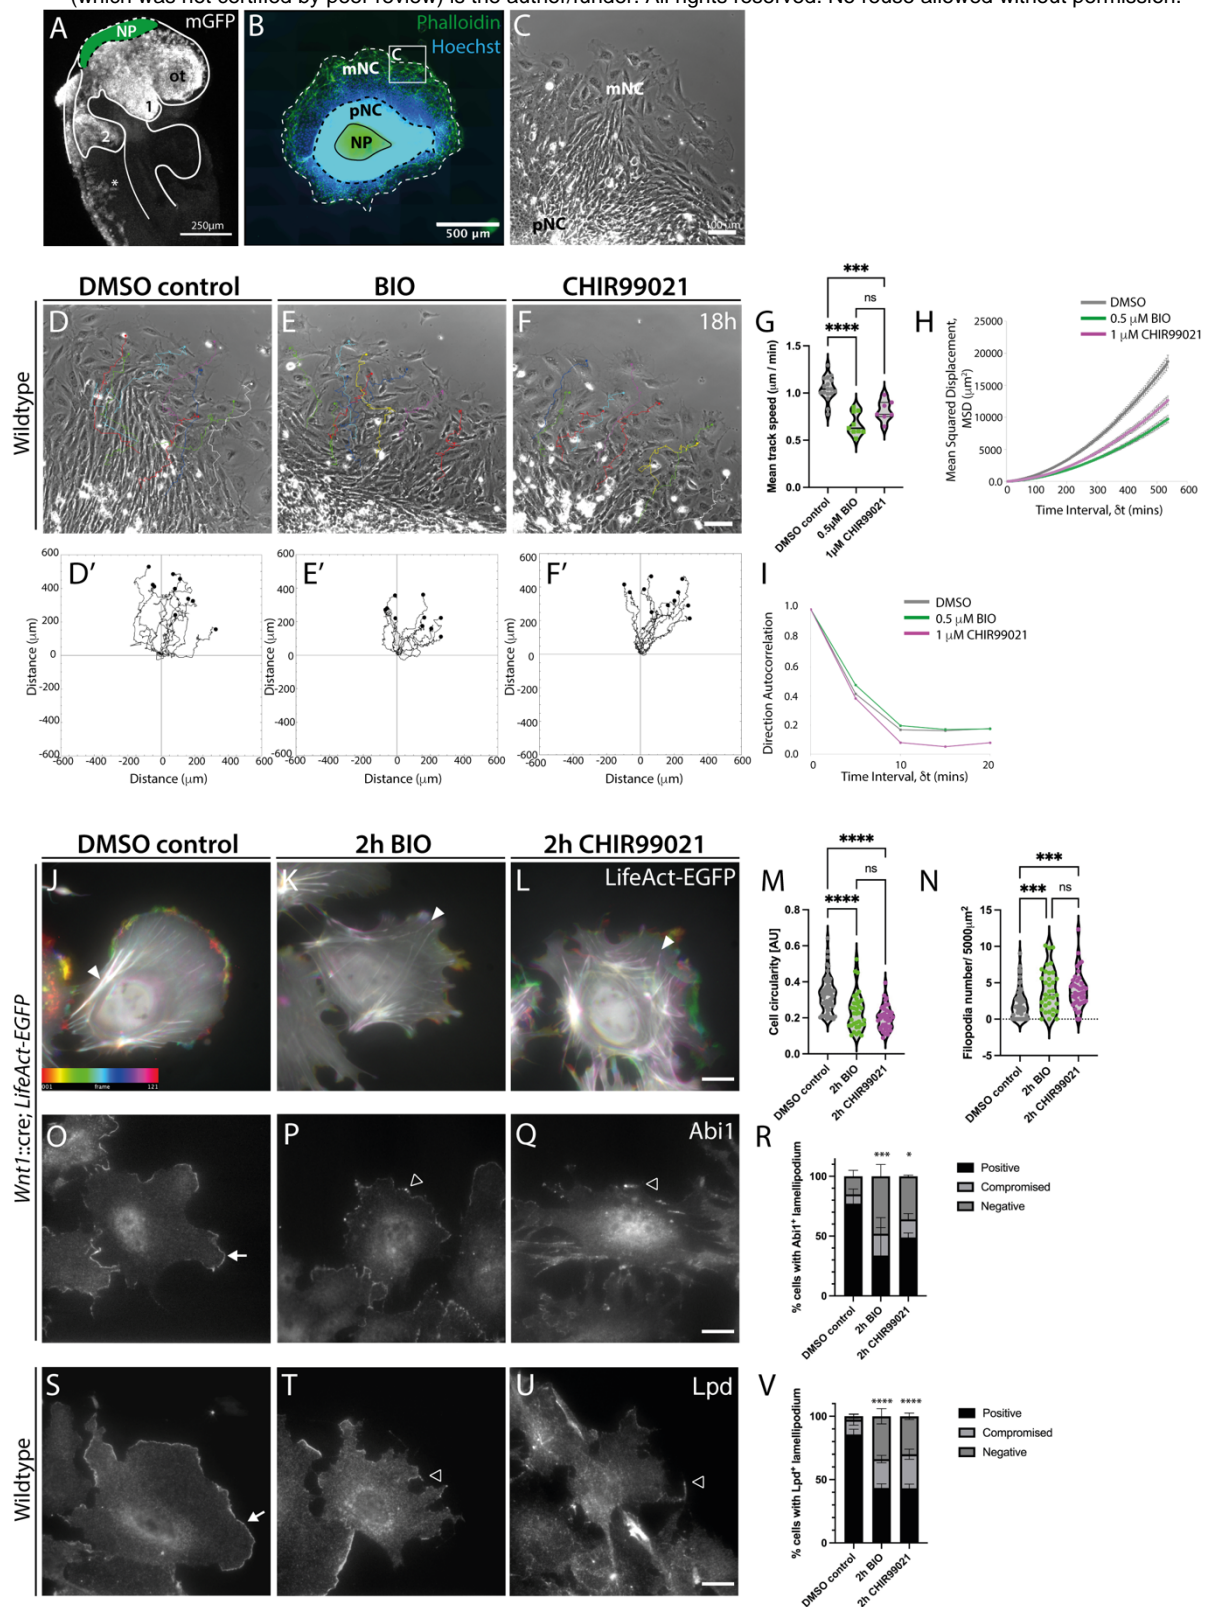

**Figure 2. Inhibition of GSK3 prevents lamellipodia formation and reduces the migration efficiency of cranial neural crest cells ex vivo. (A-C)** Neural crest explant cultures. **(A)** Schematic representation of a laterally-oriented *Wnt1::cre; Rosa26R<sup>mtmg</sup>* E8.5 embryo (5-8

ss), with neural crest cells lineage-labelled with mGFP and the dissected neural plate border (NP) pseudo-coloured green. 1: pharyngeal arch 1 (PA1), 2: PA2, ot: otic vesicle. **(B)** Neural crest explant culture 24 hours after dissection, with the actin filaments stained with phalloidin (green) and nuclei labelled with Hoechst (blue). The dissected NP is surrounded by pre-migratory neural crest cells (pNC), and an outer migratory neural crest population (mNC). Box represents imaging area used, as in **(C)**. Scale bar: 500  $\mu\text{m}$ . **(C)** Phase-contrast image of the neural crest explant edge, used for *ex vivo* cell phenotyping. Scale bar: 100  $\mu\text{m}$ . **(D-F)** Representative stills from 10x magnification phase-contrast time-lapse imaging of neural crest explants, cultured from E8.5 wildtype embryos treated with **(D)** DMSO vehicle control, or the GSK3 inhibitors, **(E)** 0.5  $\mu\text{M}$  BIO or **(F)** 1  $\mu\text{M}$  CHIR99021 for 18 hours (1 frame/ 5 min) (see **Supplementary Movie 4**). Scale bar 100  $\mu\text{m}$ . **(D'-F')** Trajectory plots of 10 migratory neural crest cells tracked through time-lapse imaging for **(D-F)**. **(G-I)** Quantification of **(G)** Mean Track Speed (MTS), **(H)** Mean Squared Displacement (MSD) and **(I)** direction autocorrelation of migratory cranial neural crest cells. For MTS calculations, each dot represents the mean speed of 10 neural crest cells imaged from the same explant: DMSO n=17 explants, 170 cells tracked; BIO n=8 explants, 80 cells tracked; CHIR99021 n=7 explants, 70 cells tracked, taken over 4 independent experiments. \*\*\*\* p < 0.0001, \*\*\* p < 0.001, ns non-significant, one-way ANOVA, Tukey's multiple comparisons test. For direction autocorrelation measures,  $\Delta t = 1$ , TR = 4 (20 min); see Materials & Methods for details. **(K-M)** Colour-coded time projection stills of 60x magnification time-lapse imaging (10 min movies, 1 frame/ 5 seconds) of migratory neural crest cells, cultured from E8.5 *Wnt1::cre; LifeAct-EGFP* embryos treated with **(J)** DMSO control, **(K)** 0.5  $\mu\text{M}$  BIO or **(L)** 1  $\mu\text{M}$  CHIR99021, 2h prior to imaging (see **Supplementary Movie 5**). Scale bar 20  $\mu\text{m}$ . **(M-N)** Quantification of neural crest **(M)** cell circularity and **(N)** filopodia number per 5000  $\mu\text{m}^2$  (approximate average neural crest cell area *ex vivo*). Leading edge protrusions were included in cell circularity measurements. DMSO: n=59 cells; 2h BIO: n=35 cells; 2h CHIR99021: n=40 cells analysed, over 3 independent experiments. \*\*\*\* p < 0.0001, \*\*\* p < 0.001, ns non-significant, one-way ANOVA, Tukey's multiple comparisons test. **(O-Q)** Abi1 immunostaining of fixed migratory cranial neural crest cells, cultured from E8.5

*Wnt1::cre; LifeAct-EGFP* embryos, treated for 2 hours with **(O)** DMSO control, **(P)** 0.5  $\mu$ M BIO or **(Q)** 1  $\mu$ M CHIR99021. **(R)** Quantification of the percentage migratory neural crest cells with a positive (white arrow), compromised (open arrowhead), or negative Abi1-positive lamellipodia at their leading edge. Data presented as mean  $\pm$  SEM. DMSO: n=42 cells; 2h BIO: n=40 cells; 2h CHIR99021: n=39 cells analysed, over 2 independent experiments. \*\*\* p < 0.001, \* p < 0.05, chi-squared test, scale bar 20  $\mu$ m. **(S-U)** Lpd immunostaining of fixed migratory cranial neural crest cells, cultured from CD1 WT E8.5 embryos, treated for 2 hours with **(S)** DMSO control, **(T)** 0.5  $\mu$ M BIO or **(U)** 1  $\mu$ M CHIR99021. Scale bar 20  $\mu$ m. **(V)** Quantification of the percentage migratory neural crest cells with a positive (white arrow), compromised (open arrowhead), or negative Lpd-positive lamellipodia at their leading edge, following 2 hour treatment with DMSO, BIO or CHIR99021. Data presented as mean  $\pm$  SEM. DMSO control: n=78 cells; 2h BIO: n=83 cells; 2h CHIR99021: n=60 cells analysed, over 3 independent experiments. \*\*\*\* p < 0.0001, chi-squared test. For Lpd immunostaining following 24 hour GSK3 inhibition, see **(Supplementary Figure 1)**.

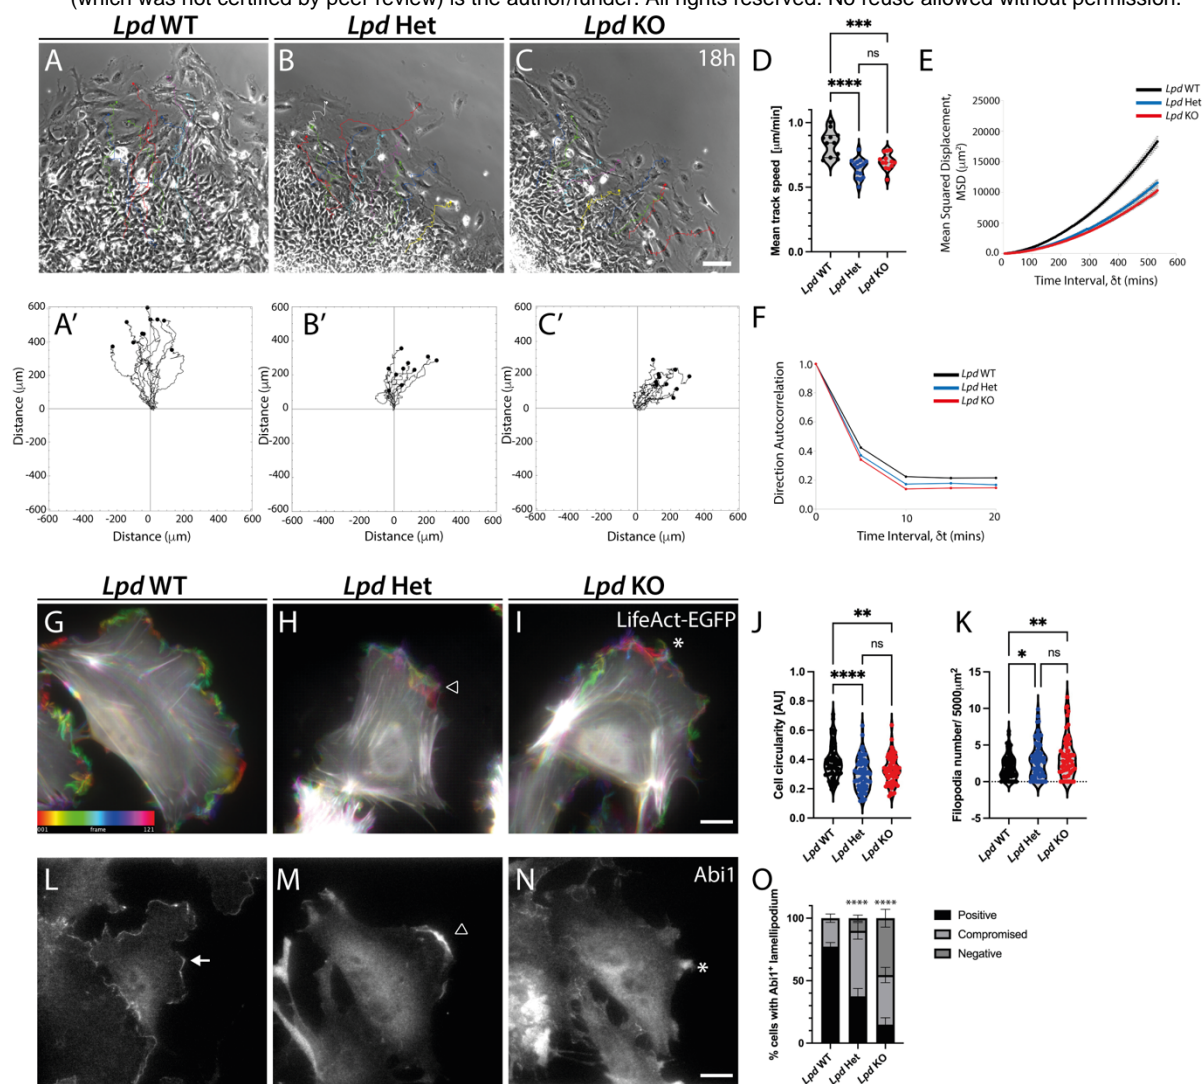

**Figure 3. Genetic deletion of *Lpd* prevents lamellipodia formation and reduces the overall migration efficiency of cranial neural crest cells *ex vivo*.** (A-C) Representative stills from 10x magnification phase-contrast time-lapse imaging of E8.5 (A) *Wnt1::cre; Lpd*<sup>+/+</sup>, (B) *Wnt1::cre; Lpd*<sup>+/*fl*</sup>, and (C) *Wnt1::cre; Lpd*<sup>*fl/fl*</sup> neural crest explant cultures, imaged for 18 hours (1 frame/ 5 min) (see **Supplementary Movie 6**). Scale bar 100  $\mu\text{m}$ . (A'-C') Trajectory plots of 10 migratory neural crest cells tracked through time-lapse imaging for (A-C). (D-F) Quantification of (D) Mean Track Speed (MTS), (E) Mean Squared Displacement (MSD), and (F) direction autocorrelation of migratory neural crest cells. For MTS calculations, each dot

represents the mean speed of 10 neural crest cells imaged from the same explant. Lpd WT: n=11 explants, 110 cells tracked; Lpd Het: n=15 explants, 150 cells tracked; Lpd KO: n=13 explants, 130 cells tracked, over 4 independent experiments. \*\*\*\* p < 0.0001, \*\*\* p < 0.001, \* p < 0.05, ns non-significant, one-way ANOVA, Tukey's multiple comparisons test. For direction autocorrelation measures,  $\Delta t = 1$ , TR = 4 (20 min); see Materials & Methods for details. **(G-I)** Colour-coded time projection stills of 60x magnification time-lapse imaging (10 min movies, 1 frame/ 5 seconds) of migratory neural crest cells, cultured from E8.5 **(G)** *Wnt1::cre; Lpd<sup>+/+</sup>; LifeAct-EGFP*, **(H)** *Wnt1::cre; Lpd<sup>+fl</sup>; LifeAct-EGFP*, and **(I)** *Wnt1::cre; Lpd<sup>fl/fl</sup>; LifeAct-EGFP* embryos (see **Supplementary Movie 7**). Open arrowhead: membrane ruffles; asterisk (\*): dynamic filopodia. Scale bar 20  $\mu\text{m}$ . **(J-K)** Quantification of neural crest **(J)** cell circularity and **(K)** filopodia number per 5000  $\mu\text{m}^2$  (approximate average neural crest cell area *ex vivo*). Leading edge protrusions were included in cell circularity measurements. Lpd WT: n=68 cells; Lpd Het: n=70 cells; Lpd KO: n=59 cells, analysed over 3 independent experiments. \*\*\*\* p < 0.0001, \*\* p < 0.01, \* p < 0.05, ns non-significant, one-way ANOVA, Tukey's multiple comparisons test. **(L-N)** Abi1 immunostaining of fixed migratory neural crest cells, cultured from **(L)** *Wnt1::cre; Lpd<sup>+/+</sup>; LifeAct-EGFP*, **(M)** *Wnt1::cre; Lpd<sup>+fl</sup>; LifeAct-EGFP*, and **(N)** *Wnt1::cre; Lpd<sup>fl/fl</sup>; LifeAct-EGFP* E8.5 embryos. Scale bar 20  $\mu\text{m}$ . **(O)** Quantification of the percentage migratory neural crest cells with a continuous Abi1-positive lamellipodium (positive), a discontinuous Abi1-labelled lamellipodium (compromised) or absent Abi1-labelled lamellipodium (negative). Data presented as mean  $\pm$  SEM. Lpd WT: n=48 cells; Lpd Het: n=97 cells; Lpd KO: n=71 cells, analysed over 3 independent experiments. \*\*\*\* p < 0.0001, chi-squared test.

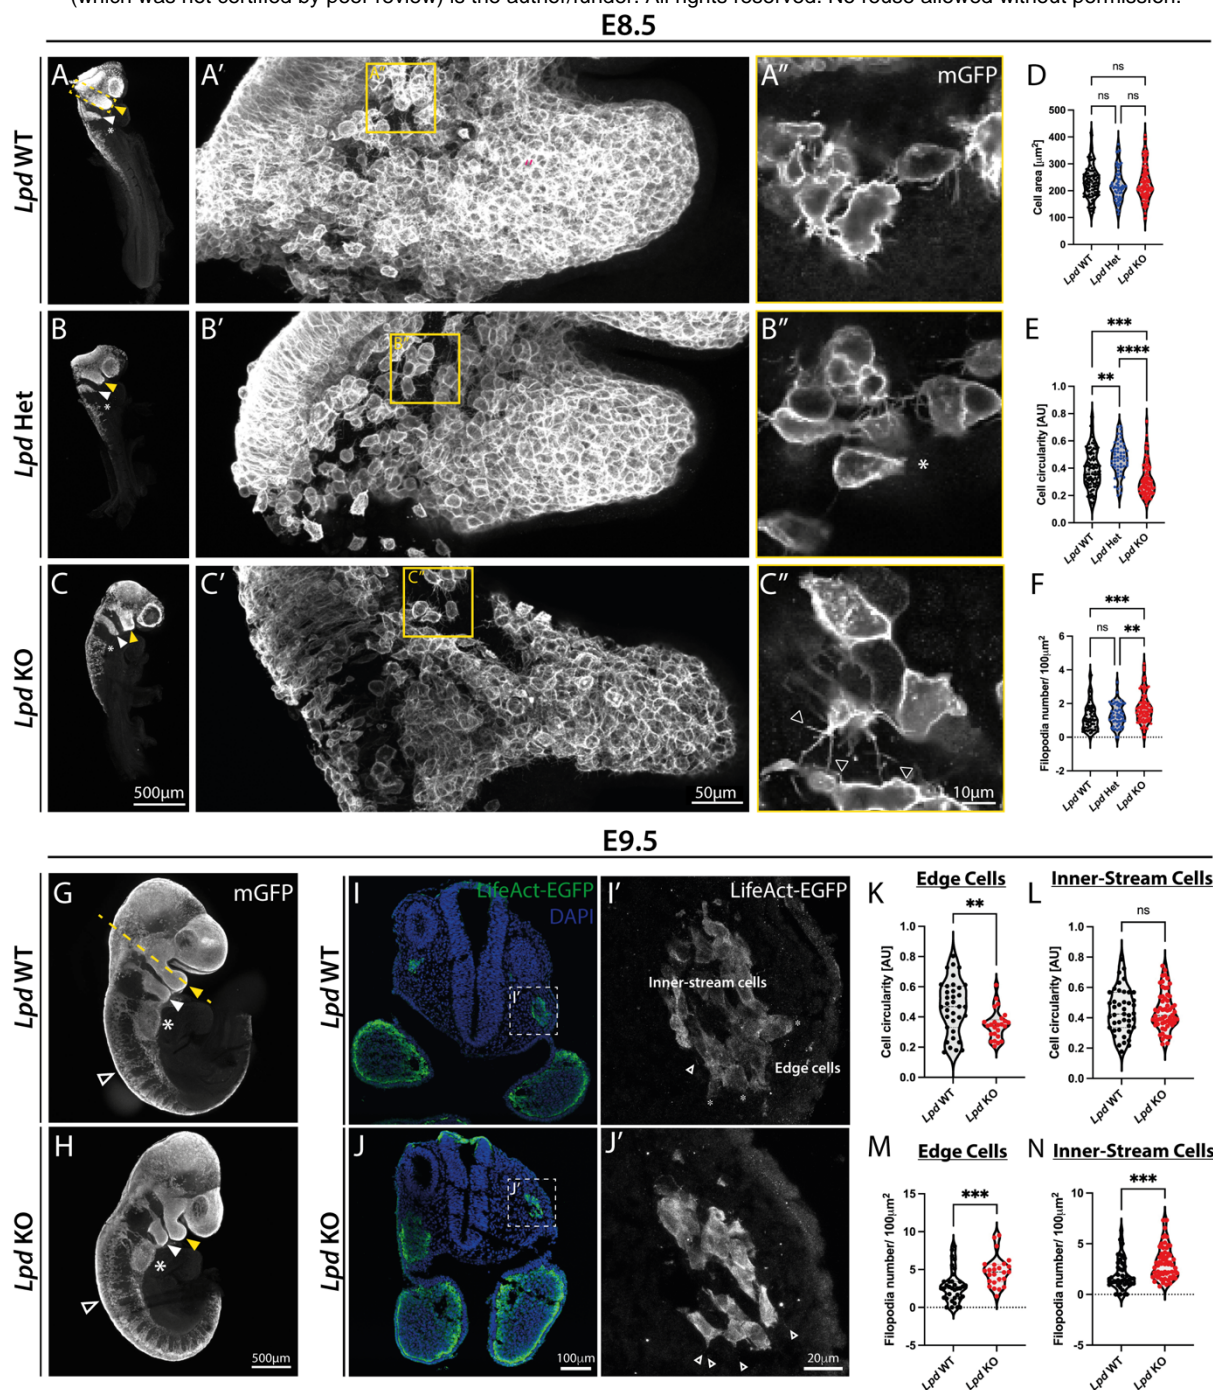

of the neural crest stream migrating towards PA1 (70  $\mu\text{m}$  z-stacks). Scale bar 50  $\mu\text{m}$ . **(A''-C'')**

Single z-stack optical slices from neuroepithelium-adjacent locations **(A'-C')**. Scale bar: 10

$\mu\text{m}$ . **(D-F)** Quantification of **(D)** cell area, **(E)** cell circularity and **(F)** filopodia number per 100

$\mu\text{m}^2$ . Each dot represents one cell (Lpd WT: N = 70, Lpd Het: N = 53, Lpd KO: N = 109), from

at least 2 embryos per genotype over 3 independent experiments. \*\*  $p < 0.01$ , \*\*\*  $p < 0.001$ ,

\*\*\*\*  $p < 0.0001$ , ns non-significant, one-way ANOVA and Tukey's multiple comparison's test.

**(G-H)** Maximum intensity projection images of **(G)** *Wnt1::cre; Lpd<sup>+/+</sup>; Rosa26<sup>MTMG</sup>* and **(H)**

*Wnt1::cre; Lpd<sup>fl/fl</sup>; Rosa26<sup>MTMG</sup>* E9.5 embryos. Scale bar 500  $\mu\text{m}$ . PA1: yellow arrowhead, PA2

(white arrowhead), cardiac/ vagal regions (\*), trunk neural crest streams (open arrowhead). **(I-**

**J)** Maximum projections of transverse sections through the head of E9.5 **(I)** *Wnt1::cre; Lpd<sup>+/+</sup>;*

*LifeAct-EGFP* or **(J)** *Wnt1::cre; Lpd<sup>fl/fl</sup>; LifeAct-EGFP* embryos. *Wnt1::cre*-driven LifeAct-EGFP

(green) marks neural crest contributions, and DAPI (blue) marks nuclei. Scale bar 100  $\mu\text{m}$ . **(I'-**

**J')** 60x magnification (2x zoom) maximum projections of **(I)** and **(J)**, indicated by a white dotted

box. Scale bar 20 $\mu\text{m}$ . **(K-L)** Quantification of neural crest cell circularity, at **(K)** the edge of the

neural crest stream or **(L)** within the stream. Leading edge protrusions including filopodia were

included in the cell circularity measurements. **(M-N)** Quantification of filopodial protrusions/100

$\mu\text{m}^2$ , at **(M)** the edge of the stream or **(N)** within the stream. Each dot represents one cell (edge

cells: Lpd WT: N = 35, Lpd KO: N = 25; inner-stream cells: Lpd WT: N = 43, Lpd KO: N = 60)

analysed over 3 independent experiments. \*\*  $p < 0.01$ , \*\*\*  $p < 0.001$ , ns non-significant,

unpaired t test.

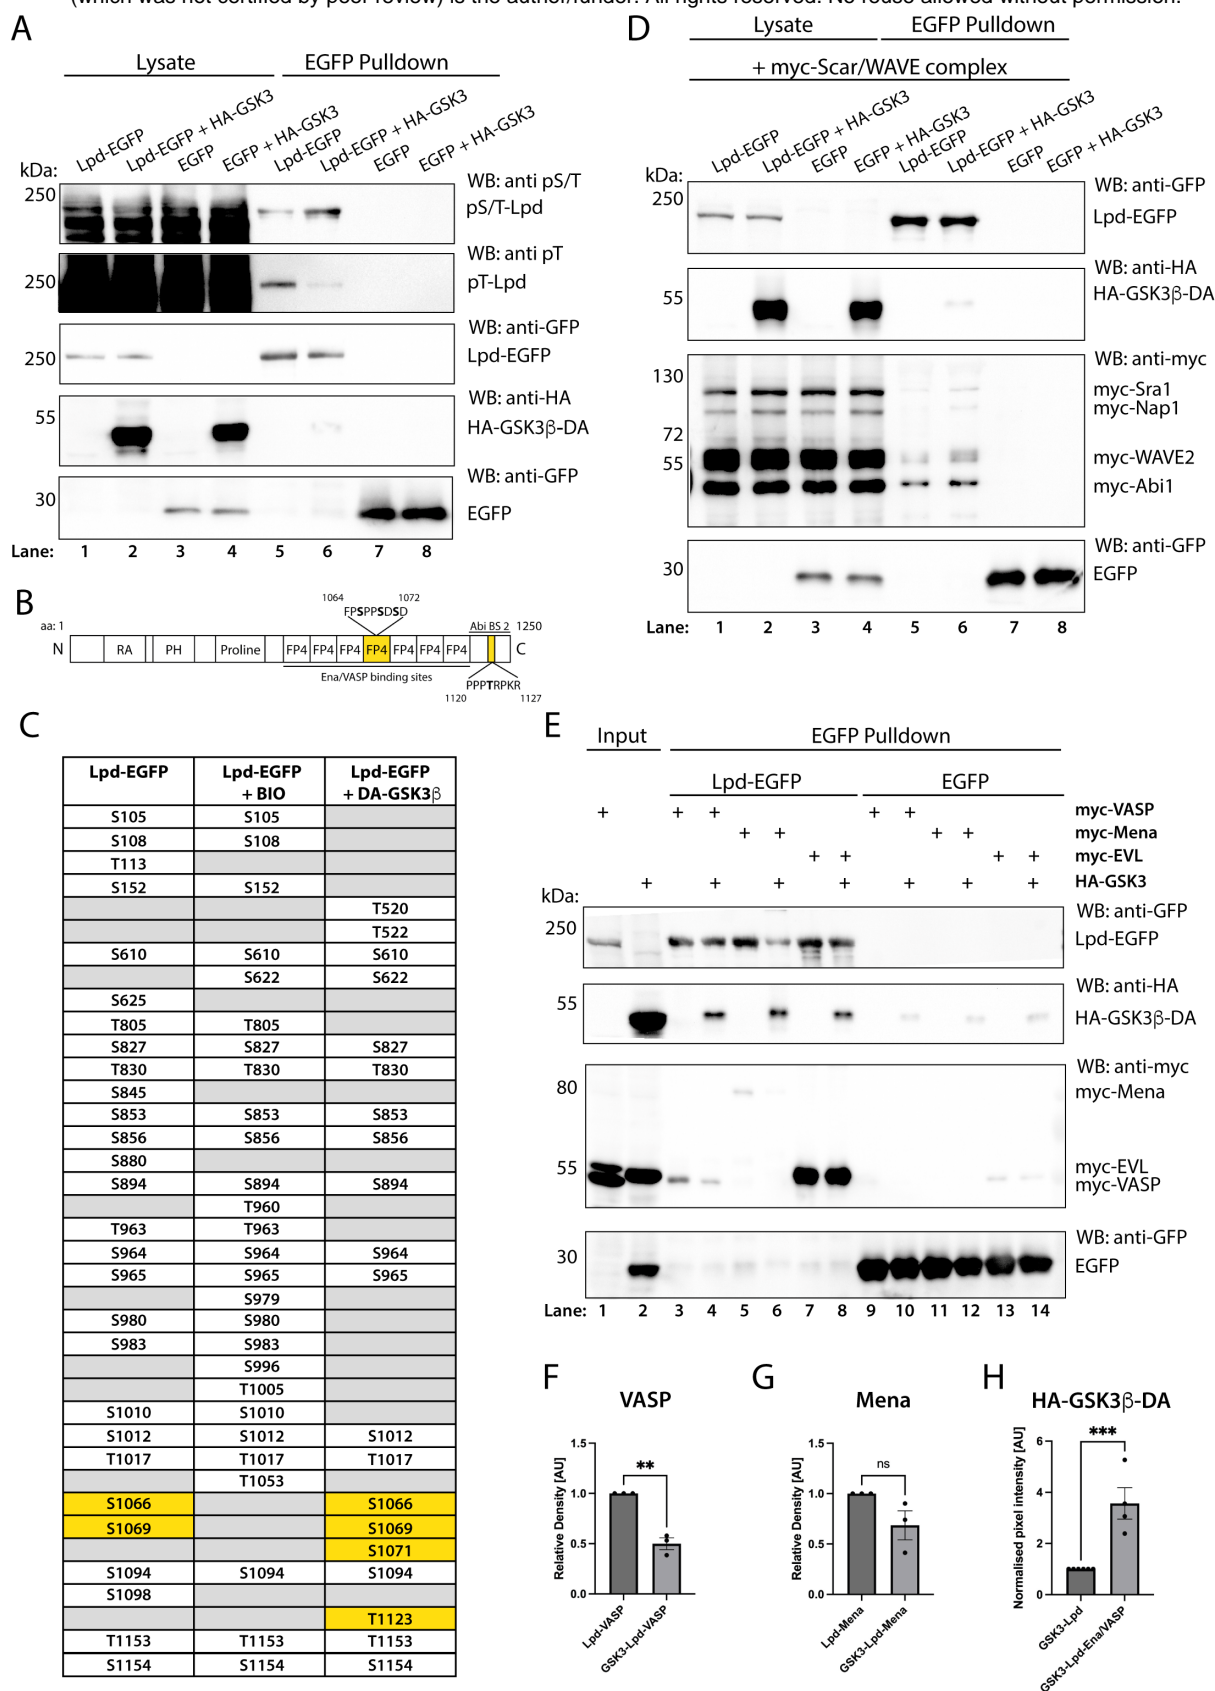

**Figure 5. GSK3 phosphorylates Lpd to increase Lpd interaction with Scar/WAVE, and reduces interaction with Ena/VASP proteins, VASP and Mena. (A)** HA-tagged, dominant-



active (DA) GSK3 $\beta$  (DA-GSK3 $\beta$ -HA) co-immunoprecipitation with Lpd-EGFP in HEK293FT cells. EGFP-Trap pulldowns were performed from cell lysates followed by western blotting and probing with anti-EGFP, anti-HA, anti-phospho-serine/threonine (pS/T) and anti-phospho-threonine (pT) antibodies. Blots are representative of 3 independent experiments. **(B)** Schematic representation of Lpd protein domain structure. RA: Ras-association domain, PH: Pleckstrin homology domain, Proline: proline-rich region, FP4: FPPPP motif (Ena/VASP binding sites). GSK3 $\beta$  phosphorylates Lpd at S1066, S1069 and S1071 within Lpd FP4-4 motif, an Ena/VASP binding site, and T1123 within Abi1 binding site 2, marked in bold (yellow boxes). **(C)** Summary table of differentially phosphorylated serine-threonine residues on Lpd in the presence or absence of GSK3 $\beta$ . Column 1: Phosphorylated Lpd S/T residues with Lpd-EGFP overexpression. Column 2: Phosphorylated Lpd S/T residues with inhibition of GSK3 and Lpd-EGFP overexpression. Column 3: Phosphorylated Lpd S/T residues with co-expression of DA-GSK3 $\beta$ -HA and Lpd-EGFP. Yellow boxes: GSK3 phosphorylation sites of interest, grey boxes: non-phosphorylated residues. **(D)** DA-GSK3 $\beta$ -HA increases the co-immunoprecipitation of myc-tagged Scar/WAVE complex components with Lpd-EGFP in HEK293FT cells. Blots were probed for anti-myc, anti-HA and anti-EGFP, and are representative of 3 independent experiments. **(E)** DA-GSK3 $\beta$ -HA reduces the co-immunoprecipitation of myc-tagged Ena/VASP proteins, myc-VASP and myc-Mena, with Lpd-EGFP in HEK293FT cells. Blots were probed for anti-myc, anti-HA and anti-EGFP, and are representative of 3 independent experiments. For the lysate control blot, see **(Supplementary Figure 4)**. **(F-H)** Quantification of normalised pixel intensity of **(F)** myc-VASP, **(G)** myc-Mena and **(H)** DA-GSK3 $\beta$ -HA, normalised to Lpd-EGFP co-immunoprecipitation band intensity. \*\*\*  $p < 0.001$ , \*\*  $p < 0.01$ , ns non-significant, unpaired t-test. Each dot represents 1 independent experiment (n=3).

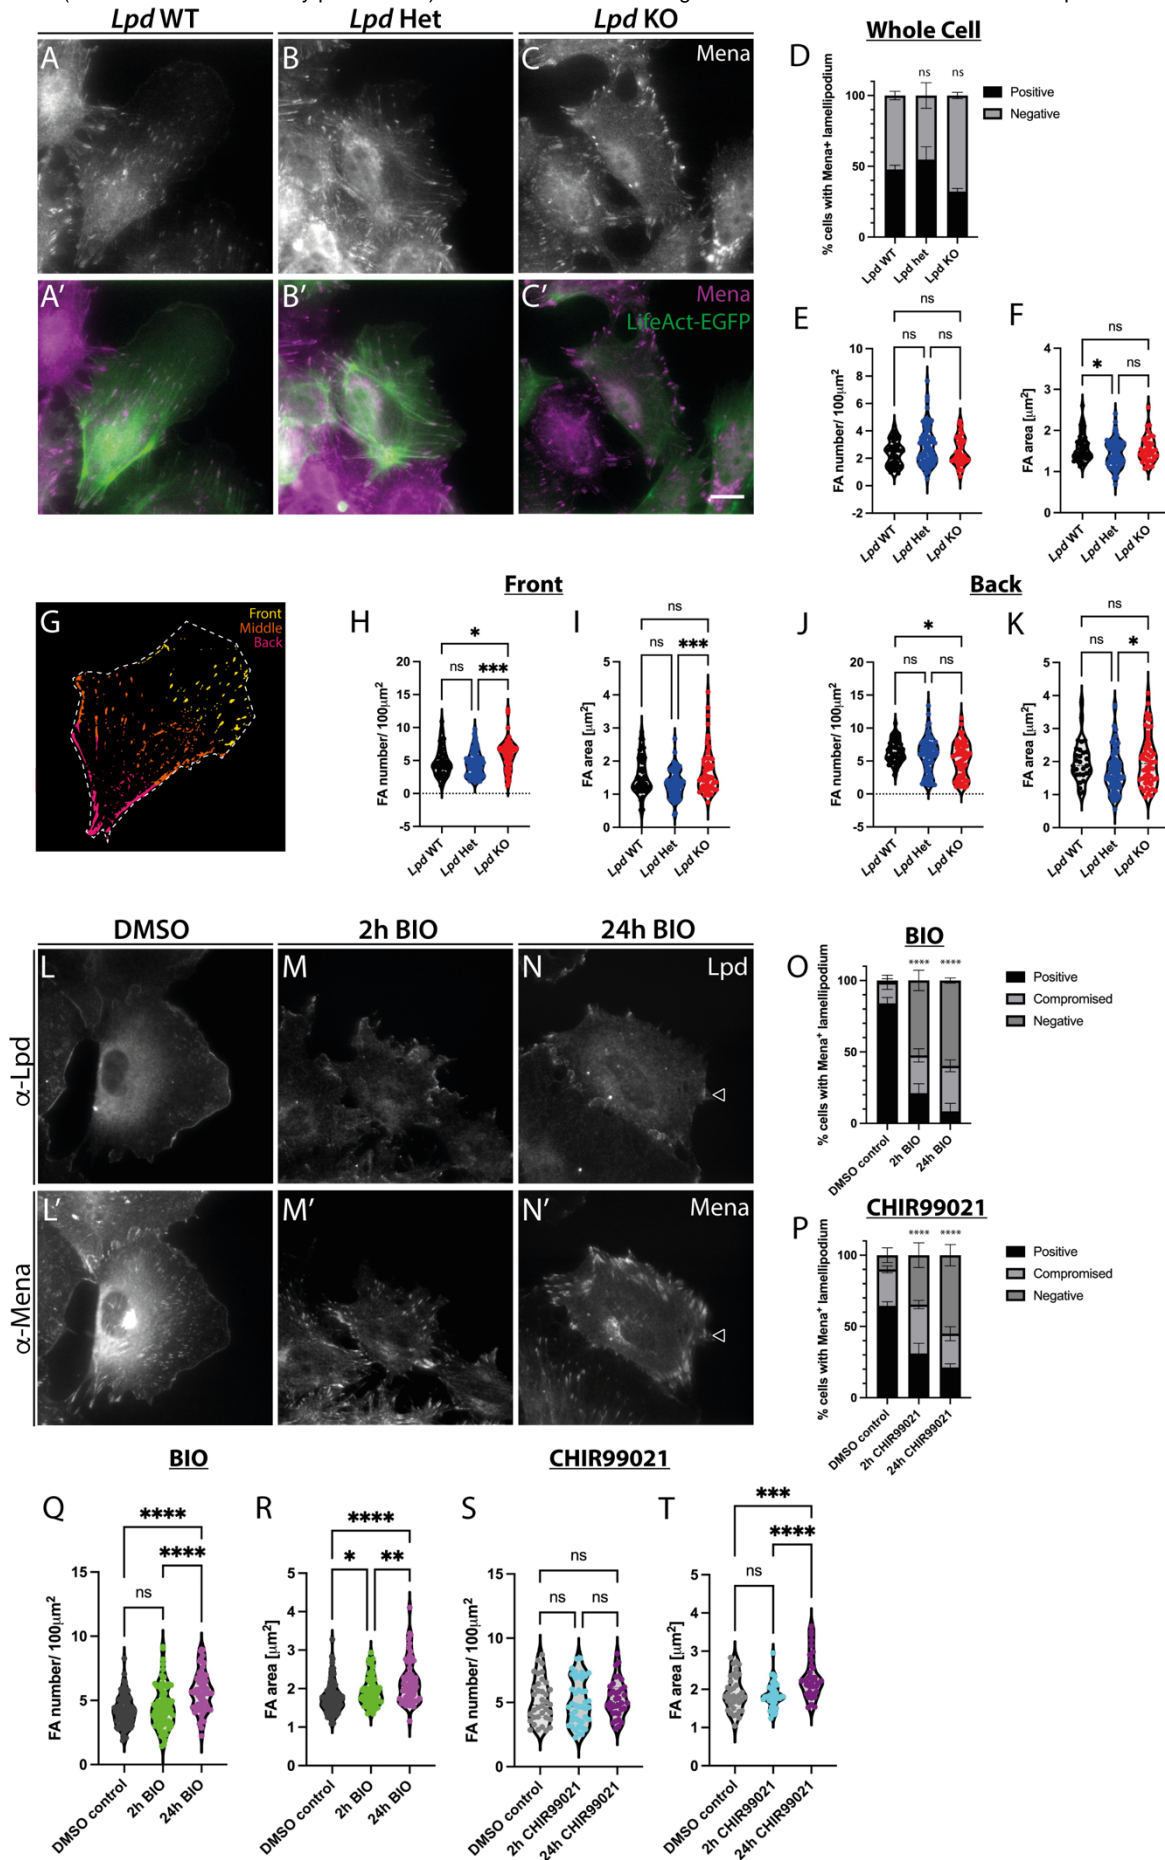

**Figure 6. *Lpd* deletion and GSK3 inhibition mislocalise Ena/VASP proteins to mature**

**focal adhesions at the front of mouse cranial neural crest cells. (A-C)** Mena

immunostaining of fixed migratory cranial neural crest cells, cultured from E8.5 **(A)** *Wnt1::cre*;

*Lpd*<sup>+/+</sup>; *LifeAct-EGFP*, **(B)** *Wnt1::cre*; *Lpd*<sup>+/fl</sup>; *LifeAct-EGFP*, and **(C)** *Wnt1::cre*; *Lpd*<sup>fl/fl</sup>; *LifeAct-*

*EGFP* embryos. **(A'-C')** Merged images of  $\alpha$ -Mena (magenta) and *LifeAct-EGFP* (green).

Scale bar 20  $\mu$ m. **(D)** Quantification of the percentage neural crest cells with Mena localisation

to the lamellipodium. Data presented as mean  $\pm$  SEM, and analysed using a chi-squared test.

**(E-F)** Quantification of the average **(E)** Mena-positive focal adhesion number/ 100  $\mu$ m<sup>2</sup>, and

**(F)** focal adhesion area in *Lpd* wild-type, conditional heterozygous and homozygous knockout

cranial neural crest cells. **(G)** Segmentation strategy used to sub-classify Mena-positive focal

adhesions according to their localisation to the front, middle and back thirds of cells. **(H-I)**

Quantification of **(H)** average Mena-positive focal adhesion number/ 100  $\mu$ m<sup>2</sup> and **(I)** average

focal adhesion area within the front third of cells. **(J-K)** Quantification of **(J)** average Mena-

positive focal adhesion number/ 100  $\mu$ m<sup>2</sup> and **(K)** average focal adhesion area within the back

third of cells. Each dot represents one cell. \*\*\*  $p < 0.001$ , \*  $p < 0.05$ , ns non-significant, one-

way ANOVA, Tukey's multiple comparisons test. *Lpd* WT: N = 48, *Lpd* Het: N = 124, *Lpd* KO:

N = 72, over 3 independent experiments. **(L-N')** *Lpd* (L-N) and Mena (L'-N') co-immunostaining

of fixed migratory cranial neural crest cells, cultured from E8.5 WT embryos, treated with **(L-**

**L')** DMSO, or the GSK3 inhibitor BIO, for **(M-M')** 2 hours or **(N-N')** 24 hours prior to fixation.

For immunofluorescence images of *Lpd*-Mena treated with CHIR99021, see **(Supplementary**

**Figure 5)**. **(O-P)** Quantification of the percentage neural crest cells with Mena localisation to

the lamellipodium. Data presented as mean  $\pm$  SEM. \*\*\*\*  $p < 0.0001$ , analysed using a chi-

squared test (n=3). **(Q-T)** Quantification of the average Mena-positive **(Q,S)** focal adhesion

number/ 100  $\mu$ m<sup>2</sup> and **(R,T)** focal adhesion area in the whole cell of DMSO control, BIO-treated

**(Q-R)** or CHIR99021-treated **(S-T)** cranial neural crest cells, 2 or 24 hours prior to fixation.

Each dot represents one cell, from 3 independent experiments. \*\*\*\*  $p < 0.0001$ , \*\*  $p < 0.01$ , \*

$p < 0.05$ , ns non-significant, one-way ANOVA, Tukey's multiple comparisons test. DMSO: N =

99, 2h BIO: N = 79, 24h BIO: N = 61, 2h CHIR99021: N = 64, 24h CHIR99021: N = 37 cells.

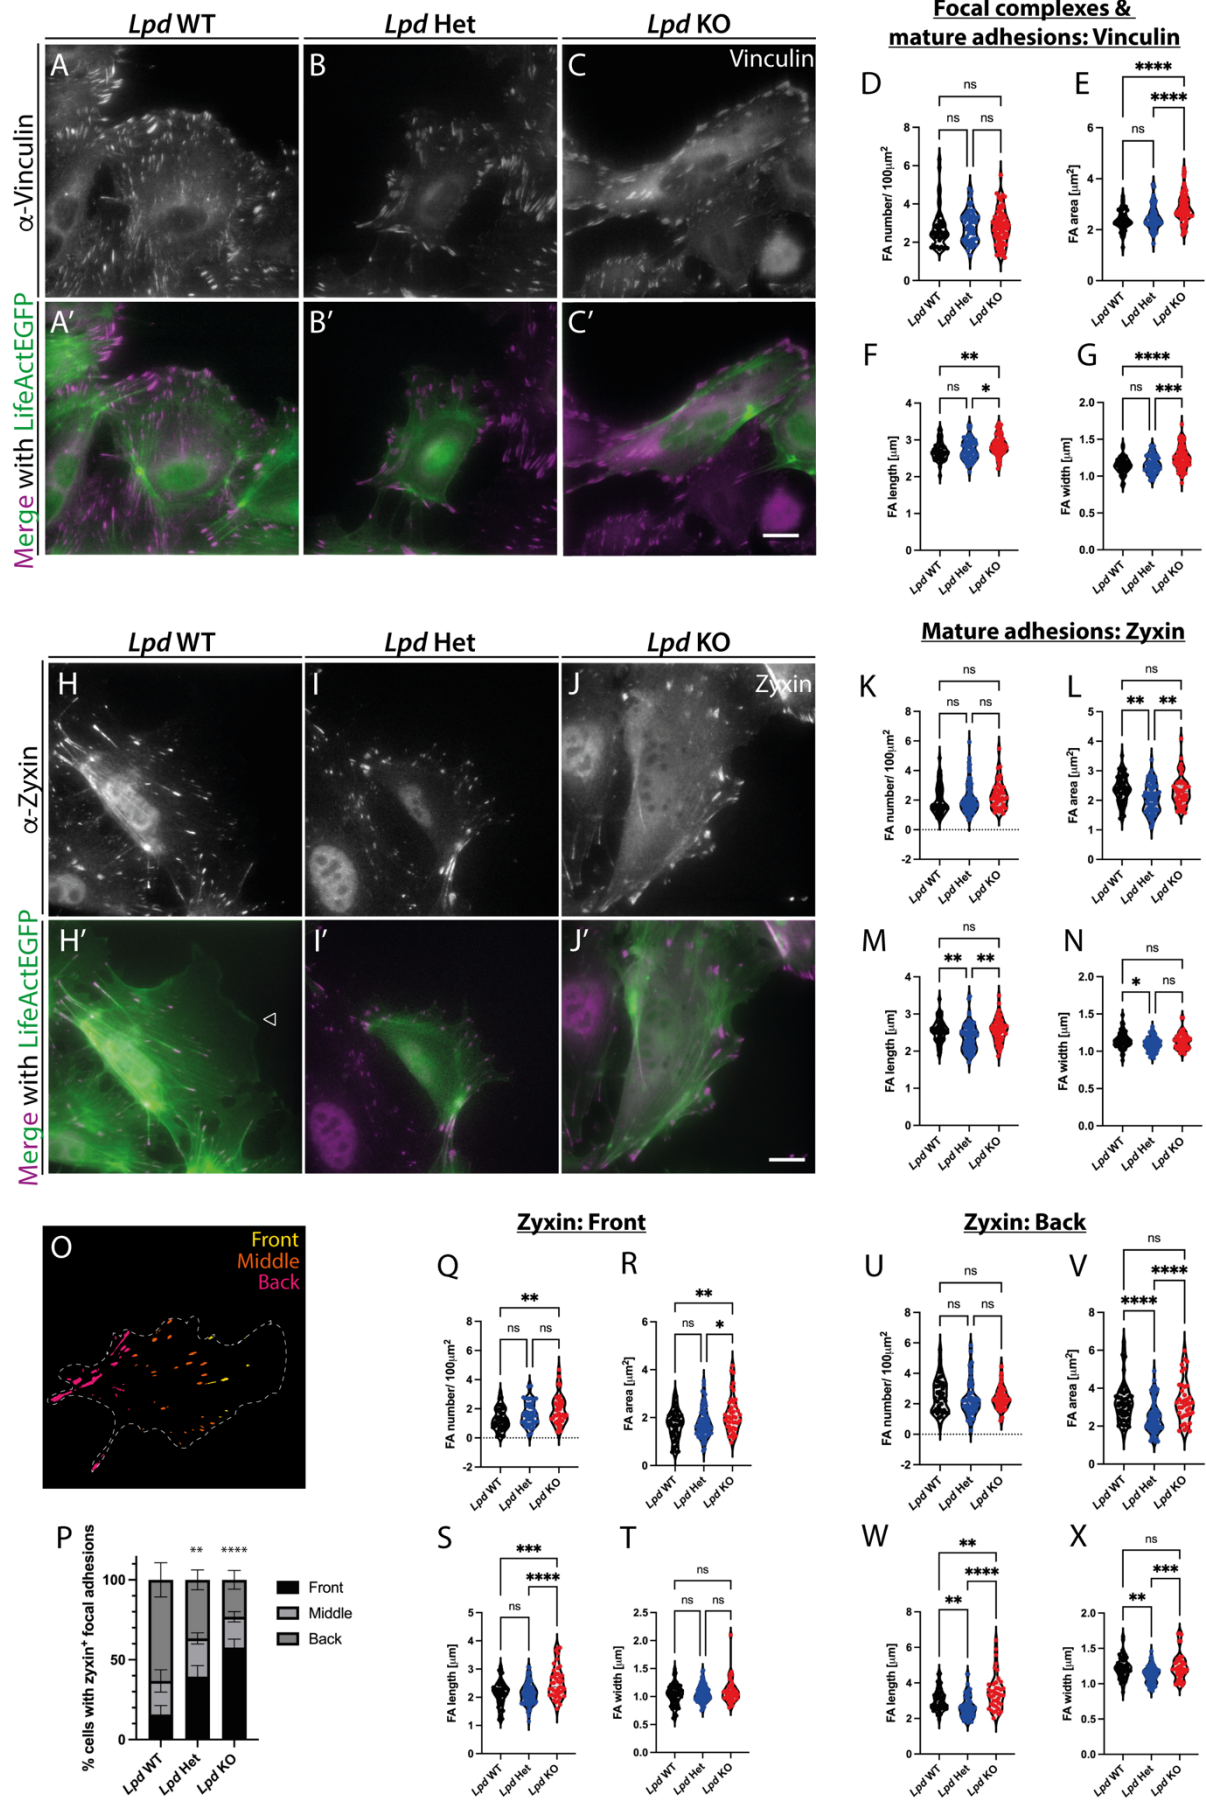

**Figure 7. Lpd inhibits nascent adhesion maturation at the leading edge of mouse cranial**

**neural crest cells. (A-C)** Vinculin immunostaining of fixed migratory cranial neural crest cells, cultured from E8.5 **(A)** *Wnt1::cre; Lpd<sup>+/+</sup>; LifeAct-EGFP*, **(B)** *Wnt1::cre; Lpd<sup>+fl</sup>; LifeAct-EGFP* and **(C)** *Wnt1::cre; Lpd<sup>fl/fl</sup>; LifeAct-EGFP* embryos. **(A'-C')** Merged immunostaining of Vinculin (magenta) with LifeAct-EGFP fusion protein (green). Scale bar 20  $\mu\text{m}$ . **(D-G)** Quantification of Vinculin-positive average **(D)** focal adhesion number/ 100  $\mu\text{m}^2$ , **(E)** focal adhesion area, **(F)** focal adhesion length and **(G)** focal adhesion width in *Lpd* wildtype, *Lpd* heterozygous and homozygous knockout cells. **(H-J)** Zyxin immunostaining of fixed migratory neural crest cells, cultured from E8.5 **(H)** *Wnt1::cre; Lpd<sup>+/+</sup>; LifeAct-EGFP*, **(I)** *Wnt1::cre; Lpd<sup>+fl</sup>; LifeAct-EGFP* and **(J)** *Wnt1::cre; Lpd<sup>fl/fl</sup>; LifeAct-EGFP* embryos. **(H'-J')** Merged immunostaining of zyxin (magenta) with LifeAct-EGFP fusion protein (green). Scale bar 20  $\mu\text{m}$ . **(K-N)** Quantification of Zyxin-positive average **(K)** focal adhesion number/ 100  $\mu\text{m}^2$ , **(L)** focal adhesion area, **(M)** focal adhesion length and **(N)** focal adhesion width in *Lpd* wild-type, *Lpd* heterozygous and homozygous knockout cells. Each dot represents one cell (*Lpd* WT: N = 42, *Lpd* Het: N = 52, *Lpd* KO: N = 73), over at least 3 independent experiments. **(O)** Segmentation strategy used to sub-classify Zyxin-positive focal adhesions according to their localisation to the front, middle and back thirds of neural crest cells. **(P)** Quantification of zyxin-positive focal adhesion localisation to the front, middle or back thirds of *Lpd* wild-type, heterozygous and homozygous knockout neural crest cells. Data presented as mean  $\pm$  SEM. \*\*\*\* p < 0.0001, \*\* p < 0.01, analysed using a chi-squared test. **(Q-T)** Quantification of zyxin-positive average **(Q)** focal adhesion number/ 100  $\mu\text{m}^2$ , **(R)** focal adhesion area, **(S)** focal adhesion length and **(T)** focal adhesion width in the front third of *Lpd* wild-type, heterozygous and homozygous knockout cells. **(U-X)** Quantification of zyxin-positive average **(U)** focal adhesion number/ 100  $\mu\text{m}^2$ , **(V)** focal adhesion area, **(W)** focal adhesion length and **(X)** focal adhesion width in the back third of cells. Each dot represents one cell (*Lpd* WT: N = 58, *Lpd* Het: N = 78, *Lpd* KO: N = 44), over at least 3 independent experiments. \*\*\*\* p < 0.0001, \*\*\* p < 0.001, \*\* p < 0.01, \* p < 0.05, ns non-significant, one-way ANOVA, Tukey's multiple comparisons test.
